# Supplementary material for: The electrostatic origins of specific ion effects: quantifying the Hofmeister series for anions
Source: Royal Society of Chemistry journal article supplement (doi:10.1039/d1sc03568a), 2021-01-01
Supplement: d1sc03568a2.xlsx [file d1sc03568a2.xlsx]

## Sheet: ShoTable
Ion	AVG POL	C6 (MCLF)	C6(TSSCS)	r cubed moment (bohr)	cuberoot(r cubed moment (bohr))	cuberoot(r cubed moment (angstrom))	cuberoot(r cubed moment (m))	Surface Area	q2(e-)	MetricSho (x10-10C.m^-1)	Electrostatic Potential Energy water	M06-2X aug-cc-pvdz(r-A)	M06-2X aug-cc-pvdz(q)	M06-2X aug-cc-pvdz(U_E)	M06-2X aug-cc-pvdz(MetricSho)	M06-2X aug-cc-pvdz(C6-MCLF)
F⁻	1.21748	92.1319	57.9774	43.0087	3.50363	1.85405	1.85405e-10	4.31971e-19	-1	-8.64148	-213.424	1.8023	-1	-215.953	-8.8896
Cl⁻	4.22028	364.647	291.098	113.591	4.843	2.56282	2.56282e-10	8.25364e-19	-1	-6.25162	-167.485	2.55473	-1	-166.421	-6.2714
Br⁻	5.83534	570.875	458.802	155.462	5.37702	2.84541	2.84541e-10	1.01742e-18	-1	-5.63074	-154.247	2.83698	-1	-153.237	-5.64747
I⁻	9.39521	806.7	742.496	235.366	6.1742	3.26727	3.26727e-10	1.34146e-18	-1	-4.90372	-137.969	3.24197	-1	-137.596	-4.94199
OH⁻	1.68619	141.641	134.828	62.3116	3.96451	2.09794	2.09794e-10	5.5309e-19	-1.23399	-9.4239	-240.651	2.00808	-1.23714	-247.054	-9.87066
OH⁻	2.77193	183.572	155.857	68.4787	4.09121	2.16498	2.16498e-10		-1	-7.40041	-190.501	2.07365	-1	-195.021	-7.72636
SH⁻	5.82482	514.939	531.206	144.566	5.24835	2.77732	2.77732e-10	9.69307e-19	-1.10724	-6.38744	-174.105	2.7523	-1.09762	-172.292	-6.38953
SH⁻	7.00021	612.616	580.329	151.077	5.32598	2.8184	2.8184e-10		-1	-5.6847	-155.422	2.79271	-1	-155.165	-5.737
FO⁻	1.37366	88.254	70.495	44.2853	3.53796	1.87222	1.87222e-10		-0.764583	-6.54303	-162.041	1.84249	-0.72268	-153.623	-6.28421
FO⁻	0.888807	21.4326	16.3801	23.0488	2.84587	1.50598	1.50598e-10		-0.235417	-2.50455	-58.065	1.49644	-0.27732	-68.1311	-2.96915
FO⁻	2.26247	192.094	154.074	67.3341	4.06829	2.15286	2.15286e-10		-1	-7.4421	-191.303	2.12575	-1	-191.458	-7.53699
ClO⁻	2.87003	58.9323	45.8137	37.9901	3.36168	1.77894	1.77894e-10		-0.70295	-6.33103	-154.518	1.74416	-0.683561	-151.092	-6.27915
ClO⁻	1.55341	193.776	174.19	86.2111	4.41761	2.33771	2.33771e-10		-0.29705	-2.03587	-53.4022	2.32901	-0.316439	-56.5534	-2.17685
ClO⁻	4.42344	466.014	394.558	124.201	4.98932	2.64025	2.64025e-10		-1	-6.06828	-163.637	2.61778	-1	-163.283	-6.12035
BrO⁻	1.73686	53.9835	41.3761	36.7126	3.32357	1.75877	1.75877e-10		-0.697885	-6.35749	-154.648	1.72164	-0.666749	-148.732	-6.20484
BrO⁻	4.00186	338.285	308.524	124.454	4.9927	2.64204	2.64204e-10		-0.302115	-1.83208	-49.4111	2.63461	-0.333251	-54.1417	-2.02659
BrO⁻	5.73872	660.14	566.542	161.166	5.44199	2.87979	2.87979e-10		-1	-5.56352	-152.778	2.85986	-1	-152.259	-5.60229
IO⁻	2.0648	47.9355	35.381	34.9172	3.26848	1.72961	1.72962e-10		-0.684983	-6.34513	-153.588
IO⁻	6.12326	663.96	624.125	198.764	5.83597	3.08828	3.08828e-10		-0.315017	-1.63429	-45.4999
IO⁻	8.18805	1059.43	932.131	233.682	6.15944	3.25945	3.25945e-10		-1	-4.91548	-138.239
CN⁻	4.03668			41.6049	3.46509	1.83366	1.83366e-10		-0.6	-5.24256	-129.073
CN⁻	4.03668			41.6049	3.46509	1.83366	1.83366e-10		-0.631922	-5.52148	-135.94
CN⁻	1.33662	56.6646	40.033	41.6049	3.46509	1.83366	1.83366e-10		-0.50942	-4.45111	-109.587	1.82419	-0.533138	-114.145	-4.68253
CN⁻	2.70006	92.3867	107.189	57.0143	3.84882	2.03672	2.03672e-10		-0.49058	-3.85913	-97.7888	2.01794	-0.466862	-92.8963	-3.70672
CN⁻	4.03668	292.51	268.577	98.6192	4.62013	2.44488	2.44488e-10		-1	-6.5532	-173.707	2.42653	-1	-173.189	-6.60274
OCN⁻	1.74338	87.7089	95.0612	45.8252	3.5785	1.89367	1.89367e-10		-0.883112	-7.47173	-185.631	1.88397	-0.902347	-188.766	-7.67377
OCN⁻	1.25734	41.4719	43.0715	31.0679	3.14367	1.66357	1.66357e-10		-0.641751	-6.18068	-147.865	1.64715	-0.653873	-150.439	-6.36019
OCN⁻	4.2025	451.658	423.655	103.813	4.69984	2.48706	2.48706e-10		-1	-6.44205	-171.429	2.46592	-1	-171.052	-6.49726
NCS⁻	4.40255	310.353	345.851	105.919	4.73142	2.50377	2.50377e-10		-0.688212	-4.4039	-117.37	2.49585	-0.687445	-116.496	-4.41296
NCS⁻	3.29983				4.04722	2.14171	2.14171e-10		-0.652868	-4.98168	-126.536	2.13142	-0.655895	-125.327	-5.03704
SCN⁻	2.19712	57.2467	71.2901	38.0352	3.36301	1.77964	1.77964e-10		-0.617524	-5.55945	-135.702	1.76698	-0.624345	-136.74	-5.66113
NCS⁻	7.59843	959.397	997.558	173.175	5.57393	2.94961	2.94961e-10		-1	-5.43182	-149.879	2.93765	-1	-149.026	-5.45394
N₃⁻	2.51468	84.3119	92.1021	42.6748	3.49454	1.84924	1.84924e-10		-0.691448	-5.99068	-147.847	1.84497	-0.744446	-158.097	-6.4648
N₃⁻	5.57498	534.378	507.216	108.46	4.76894	2.52363	2.52363e-10		-1	-6.3487	-169.503	2.51076	-1	-168.682	-6.38123
I₃⁻	11.1814	620.836	627.941	187.662	5.72521	3.02967	3.02967e-10		-0.476366	-2.51916	-69.8773	3.00715	-0.481993	-70.492	-2.568
I₃⁻					6.92839	3.66637	3.66637e-10		-0.738183	-3.12125	-89.7261	3.64069	-0.740997	-92.6477	-3.15823
I₃⁻	25.0095	5154.13	5126.83	537.682	8.13158	4.30307	4.30307e-10		-1	-3.72334	-109.575	4.27423	-1	-109.189	-3.74846
FO₂⁻	1.38018	58.6305	48.9238	36.5137	3.31756	1.75558	1.75558e-10		-0.630273	-5.75198	-139.844	1.73773	-0.600796	-133.145	-5.53931
FO₂⁻	3.24775	357.401	295.108	90.4342	4.4886	2.37527	2.37527e-10		-1	-6.74523	-177.6	2.35749	-1	-177.067	-6.79612
ClO₂⁻	1.47591	56.1221	43.128	36.2642	3.30999	1.75158	1.75158e-10		-0.694573	-6.35329	-154.36	1.72806	-0.702758	-156.355	-6.51566	606.802
ClO₂⁻	4.70336	643.412	554.313	139.145	5.1819	2.74216	2.74216e-10		-1	-5.84276	-158.834	2.70943	-1	-158.927	-5.91333
BrO₂⁻	1.20251	55.961	42.2885	36.694	3.32301	1.75847	1.75847e-10		-0.917087	-8.35576	-203.246	1.7346	-0.923645	-204.953	-8.53131
BrO₂⁻	3.57775	426.543	375.557	98.9233	4.62487	2.44739	2.44739e-10		-1	-6.54648	-173.57	2.40839	-1	-174.192	-6.65248
IO₂⁻	1.86593	52.6563	38.5374	35.9847	3.30146	1.74707	1.74707e-10		-0.733352	-6.72533	-163.275
IO₂⁻	7.68304	1202.97	1086.24	234.29	6.16478	3.26228	3.26228e-10		-1	-4.91122	-138.141
NO₂⁻	1.49725	57.2954	43.3055	35.7887	3.29545	1.74389	1.74389e-10		-0.549249	-5.04616	-122.443	1.72214	-0.585845	-130.658	-5.45036
NO₂⁻	3.73498	431.482	354.649	102.229	4.67582	2.47435	2.47435e-10		-0.999999	-6.47513	-172.109	2.44124	-1	-172.385	-6.56297
NO₃⁻	1.31113	40.4495	35.8299	31.1161	3.1453	1.66443	1.66443e-10		-0.60081	-5.78339	-138.382	1.64796	-0.616098	-141.699	-5.98981
NO₃⁻	4.1939	540.502	488.164	113.369	4.83984	2.56115	2.56115e-10		-1	-6.2557	-167.57	2.53657	-1	-167.347	-6.3163
FO₃⁻	1.27394	44.5386	37.0605	32.085	3.17761	1.68153	1.68153e-10		-0.481525	-4.58802	-110.121	1.67227	-0.466005	-106.092	-4.46473
FO₃⁻	4.10321	571.959	466.372	113.379	4.83998	2.56122	2.56122e-10		-0.999999	-6.25551	-167.566	2.54922	-1	-166.701	-6.28498
ClO₃⁻	1.2766	45.4632	34.2971	32.9068	3.20451	1.69576	1.69576e-10		-0.643908	-6.08372	-146.393	1.68451	-0.675239	-152.946	-6.42234
ClO₃⁻	4.95157	824.578	719.917	155.397	5.37627	2.84501	2.84501e-10		-1	-5.63153	-154.265	2.81693	-1	-154.104	-5.68767	793.644
BrO₃⁻	1.38419	48.3565	36.5585	34.2848	3.24863	1.71911	1.71911e-10		-0.710285	-6.61971	-159.944	1.69911	-0.723447	-162.88	-6.82177
BrO₃⁻	5.90068	1032.51	918.137	183.786	5.68553	3.00867	3.00867e-10		-1	-5.32521	-147.512	2.97359	-1	-147.578	-5.38802	976.551
IO₃⁻	1.65196	50.0089	37.2635	35.2461	3.27871	1.73503	1.73503e-10		-0.76135	-7.03053	-170.336	1.71215	-0.786903	-176.218	-7.36358
IO₃⁻	7.3194	1377.08	1258.83	236.209	6.18156	3.27116	3.27116e-10		-1	-4.89789	-137.835	3.22493	-1	-138.189	-4.9681
FO₄⁻	1.16399	38.2905	31.1606	29.9296	3.1048	1.643	1.643e-10		-0.374279	-3.6498	-86.9846	1.63545	-0.353213	-81.6675	-3.46027
FO₄⁻	4.80842	849.081	674.265	137.675	5.16358	2.73246	2.73246e-10		-1	-5.86349	-159.279	2.72395	-1	-158.258	-5.88182
ClO₄⁻	1.1345	32.833	27.3315	29.4252	3.08726	1.63372	1.63372e-10		-0.626964	-6.1486	-146.282	1.63289	-0.639786	-148.088	-6.27754
ClO₄⁻	5.07515	942.104	843.604	163.879	5.47236	2.89586	2.89586e-10		-1	-5.53264	-152.101	2.89265	-1	-150.879	-5.53879
BrO₄⁻	1.25986	36.4595	30.3749	31.1527	3.14653	1.66508	1.66508e-10		-0.691022	-6.64917	-159.117	1.6544	-0.698737	-160.271	-6.7668
BrO₄⁻	6.09377	1195.43	1071.62	191.235	5.76133	3.04878	3.04878e-10		-0.999999	-5.25514	-145.946	3.02676	-1	-145.487	-5.29338
IO₄⁻	1.56008	39.5377	32.3648	32.5352	3.1924	1.68935	1.68936e-10		-0.743092	-7.04745	-169.39
IO₄⁻	7.4864	1579.74	1430.59	238.484	6.20135	3.28163	3.28163e-10		-1	-4.88226	-137.475
BF₄⁻	0.62089	19.9111	16.5918	23.2439	2.85388	1.51022	1.51022e-10		-0.54799	-5.81358	-134.905	1.50483	-0.537769	-131.62	-5.72556
BF₄⁻	0.487673	15.592	24.2307	18.9884	2.66786	1.41178	1.41178e-10		1.19196		306.926
BF₄⁻	1.10856
BF₄⁻	2.97079	466.66	420.341	111.963	4.81975	2.55052	2.55052e-10		-1	-6.28177	-168.113	2.54143	-0.999999	-167.098	-6.30423
HCO₂⁻	1.28357	52.5865	44.3811	35.0289	3.27197	1.73146	1.73146e-10		-0.721141	-6.67296	-161.574	1.70563	-0.732158	-164.398	-6.87748
HCO₂⁻	4.06587	473.263	425.376	104.282	4.70691	2.4908	2.4908e-10		-1	-6.43238	-171.23	2.45772	-1	-171.493	-6.51895
Pic⁻	1.824	26.4323	23.8844	26.4687	2.98019	1.57706	1.57706e-10		-0.472362	-4.79886	-112.917	1.57706	-0.472362	-111.986	-4.79886
Pic⁻	2.26781	24.3404	21.9231	25.8494	2.95676	1.56466	1.56466e-10		-0.44703	-4.57749	-107.439
Pic⁻	2.57573	24.7558	23.6422	25.5019	2.94345	1.55761	1.55762e-10		-0.422651	-4.34743	-101.893
Pic⁻	21.9077	7877.2	8122.47	423.548	7.5099	3.97409	3.97409e-10		-1	-4.03156	-117.238	3.97409	-1	-116.162	-4.03156
PF₆⁻	0.610666	17.1593	14.9354	22.017	2.80276	1.48317	1.48317e-10		-0.487229	-5.26325	-121.412	1.4798	-0.478558	-118.458	-5.18133
PF₆⁻	4.25806	1046.18	944.521	172.099	5.56236	2.94349	2.94349e-10		-1	-5.44312	-150.129	2.94921	-1	-148.557	-5.43256	1071.01
CH₃COO⁻	1.30491	49.1745	42.7667	34.6841	3.26119	1.72576	1.72576e-10		-0.766444	-7.11559	-172.123	1.7006	-0.772354	-173.784	-7.27653
CH₃COO⁻	5.72212	855.203	866.17	143.188	5.23161	2.76846	2.76847e-10		-1	-5.78724	-157.64	2.74489	-1	-157.303	-5.83694	813.388
CF₃COO⁻	1.34032	40.7201	35.6839	31.9988	3.17476	1.68002	1.68002e-10		-0.657966	-6.2748	-150.566	1.66123	-0.666196	-152.37	-6.42514
CF₃COO⁻	0.67972	15.2338	11.8471	20.1473	2.72106	1.43993	1.43993e-10		-0.281508	-3.13227	-71.5466	1.43586	-0.282717	-71.4035	-3.15464
CF₃COO⁻	5.47954	1145.86	1054.22	172.11	5.56247	2.94355	2.94355e-10		-1	-5.44302	-150.127	2.92082	-1	-149.714	-5.48536
CCl₃COO⁻	1.39915	38.7969	33.1875	31.1211	3.14547	1.66452	1.66452e-10		-0.640157	-6.16182	-147.439	1.64481	-0.649149	-149.499	-6.32321
CCl₃COO⁻	2.60433	127.563	111.895	70.7216	4.13539	2.18837	2.18837e-10		-0.188474	-1.37988	-35.6169	2.18574	-0.190526	-35.726	-1.39658
CCl₃COO⁻	11.2698	3218.09	3014.37	326.829	6.88821	3.64511	3.64511e-10		-1	-4.39542	-126.054	3.62924	-1	-125.36	-4.41463
CBr₃COO⁻	1.48347	38.338	32.5002	30.8455	3.13615	1.65959	1.65959e-10		-0.630827	-6.09005	-145.59	1.63722	-0.636445	-147.044	-6.22822
CBr₃COO⁻	3.62591	229.911	205.628	103.372	4.69318	2.48353	2.48354e-10		-0.172048	-1.10992	-29.5264	2.48072	-0.175589	-29.8962	-1.13404
CBr₃COO⁻	14.5653	4658.8	4350.57	424.209	7.5138	3.97615	3.97615e-10		-0.999999	-4.02946	-117.186	3.963	-1	-116.437	-4.04284
CI₃COO⁻	1.53044	38.0516	31.8486	30.5552	3.12628	1.65436	1.65436e-10		-0.621329	-6.01729	-143.712	1.63021	-0.627637	-145.44	-6.16842
CI₃COO⁻	5.64937	460.621	433.281	166.812	5.50481	2.91303	2.91303e-10		-0.153163	-0.842401	-23.1865	2.9001	-0.156781	-23.6064	-0.866146
CI₃COO⁻	20.705	7552.03	7176.73	612.766	8.49372	4.49471	4.49471e-10		-1	-3.56459	-105.556	4.46998	-0.999999	-105.075	-3.5843	7236.3
CF₂ClCOO⁻	1.39915	40.2838	33.9379	31.5803	3.16086	1.67266	1.67266e-10		-0.647754	-6.20458	-148.683	1.65355	-0.659047	-151.221	-6.3857
CF₂ClCOO⁻	0.716173	14.9967	12.487	19.9601	2.71261	1.43546	1.43546e-10		-0.236048	-2.63463	-60.1166	1.42955	-0.232625	-58.9242	-2.60715
CF₂ClCOO⁻	2.5538	120.892	114.368	71.2009	4.14472	2.1933	2.1933e-10		-0.269923	-1.97175	-50.9226	2.19539	-0.278283	-52.0092	-2.03088
CF₂ClCOO⁻	7.46492	1702.97	1588.11	224.073	6.07383	3.21415	3.21415e-10		-0.999999	-4.98476	-139.827	3.19639	-1	-139.195	-5.01246
CFCl₂COO⁻	1.27942	39.7811	34.1191	31.4498	3.1565	1.67036	1.67036e-10		-0.646074	-6.19703	-148.44	1.65142	-0.654942	-150.414	-6.35413	2315.19
CFCl₂COO⁻	0.722545	15.8274	10.593	19.9996	2.7144	1.4364	1.4364e-10		-0.199576	-2.22609	-50.8058	1.4305	-0.194488	-49.2424	-2.17829
CFCl₂COO⁻	2.59529	121.847	113.597	70.4388	4.12988	2.18545	2.18545e-10		-0.221252	-1.62202	-41.853	2.18438	-0.226952	-42.5762	-1.66462
CFCl₂COO⁻	9.39546	2393.36	2249.5	275.687	6.50837	3.4441	3.4441e-10		-1	-4.65195	-132.124	3.42808	-1	-131.431	-4.67369
benzoate⁻												1.67365	-0.716525	-163.033	-6.85927
benzoate⁻												3.54067	-1	-127.962	-4.52506
formate⁻	1.28357	53.6087	41.7476	35.0293	3.27197	1.73146	1.73146e-10		-0.721165	-6.67316	-161.579	1.70562	-0.731892	-164.34	-6.87505
formate⁻	4.06587	473.265	425.379	104.281	4.70691	2.4908	2.4908e-10		-1	-6.43238	-171.23	2.45779	-1	-171.489	-6.51876	439.193
propionate⁻	1.50436	52.1204	42.0227	35.1445	3.27556	1.73336	1.73336e-10		-0.769583	-7.1134	-172.295	1.70662	-0.773642	-173.642	-7.26296
propionate⁻	7.32458	1391.22	1446.59	180.439	5.6508	2.99029	2.99029e-10		-0.999999	-5.35793	-148.241	2.97035	-1	-147.707	-5.39389	1343.35
butanoate⁻	1.69004	51.2033	41.4164	4.89003	3.26764	1.72917	1.72917e-10		-0.762026	-7.06063	-170.894	1.70308	-0.767373	-172.487	-7.2191
butanoate⁻	9.03003	2087.13	2281.25	218.668	6.0246	3.1881	3.1881e-10		-1	-5.0255	-140.757	3.17115	-1	-140.096	-5.05235	2033.76
CF₃SO₃⁻	0.733214	13.8676	10.9663	19.7238	2.70186	1.42977	1.42977e-10		-0.246565	-2.76296	-62.9604	1.424	-0.243446	-61.8244	-2.73907	813.388
CF₃SO₃⁻	1.20044	34.4391	28.0949	30.3651	3.11978	1.65093	1.65093e-10		-0.666041	-6.46373	-154.276	1.64623	-0.68261	-157.111	-6.64342
CF₃SO₃⁻	6.68309	1751.17	1582.75	225.363	6.08547	3.22031	3.22031e-10		-1	-4.97523	-139.609	3.20798	-1	-138.785	-4.99435	1728.03
HCO₂⁻	1.28357	52.5865	44.3811	35.0289	3.27196	1.73146	1.73146e-10		-0.721141	-6.67296	-161.574	1.70563	-0.732158	-164.398	-6.87748
HCO₂⁻	0.766555	6.1638	4.49069	6.96799	1.91001	1.01074	1.01074e-10		-0.103103	-1.63434	-32.665
HCO₂⁻	4.06587	473.263	425.376	104.282	4.70691	2.4908	2.4908e-10		-1	-6.43238	-171.23	2.45772	-1	-171.492	-6.51895	438.929
HCO₃⁻	1.18295	44.6529	40.9419	33.8768	3.23569	1.71226	1.71226e-10		-0.806466	-7.54615	-182.112	1.69543	-0.819422	-184.768	-7.74353	563.759
HCO₃⁻	0.82657	30.9181	34.3748	30.3287	3.11854	1.65027	1.65027e-10		-0.693941	-6.73719	-160.783
HCO₃⁻	4.30504	601.846	566.437	122.501	4.96645	2.62814	2.62814e-10		-1	-6.09623	-164.227	2.60035	-1	-164.138	-6.16138
HSO₄⁻	1.081	36.8398	31.3527	31.7013	3.16489	1.6748	1.6748e-10		-0.78056	-7.46714	-179.008	1.66776	-0.78888	-179.938	-7.57859	1012.02
HSO₄⁻	5.37997	1033.76	951.572	171.865	5.55984	2.94216	2.94216e-10		-1	-5.44559	-150.184	2.92815	-1	-149.414	-5.47165
H₂PO₄⁻	1.07107	44.7743	38.6622	34.724	3.26245	1.72642	1.72642e-10		-0.938137	-8.70623	-210.624	1.70983	-0.930737	-208.627	-8.72134	1110.29
H₂PO₄⁻	0.718396	28.353	29.3845	29.7676	3.09918	1.64003	1.64003e-10		-0.777997	-7.60042	-181.038
H₂PO₄⁻	5.7033	1149.21	1092.78	181.538	5.66225	2.99635	2.99635e-10		-1	-5.3471	-148	2.97882	-1	-147.37	-5.37857
HF₂⁻												1.60064	-0.719466	-168.839	-7.20156
HF₂⁻												2.06274	-1	-195.783	-7.76722	149.105
HOO⁻	1.5383	97.1668	77.1199	46.8078	3.6039	1.90711	1.90711e-10		-0.817179	-6.86518	-170.897	1.85602	-0.782769	-165.524	-6.75712
HOO⁻	0.974754	33.3599	35.3128	31.9945	3.17462	1.67995	1.67994e-10		-0.473356	-4.51443	-108.324	1.66066	-0.499501	-114.271	-4.81911
HOO⁻	3.13542	284.563	243.174	82.7669	4.35798	2.30616	2.30616e-10		-1	-6.9474	-181.644	2.25823	-1	-182.957	-7.09482	249.365
Ph₄B⁻												5.08134	-1	-94.0131	-3.15306	36161.6
BtFMSa												1.60691	-0.60698	-142.059	-6.05191
BtFMSa												1.41581	-0.230662	-58.8018	-2.61024
BtFMSa												3.92962	-1	-117.271	-4.07718	5890.25
NTf2												1.74928	-0.70202	-154.851	-6.42985
NTf2												1.61427	-0.609901	-142.293	-6.05331
NTf2												1.41729	-0.233737	-59.5446	-2.64228
NTf2												3.93272	-1	-117.193	-4.07397
heptafluorobutanoate												1.65086	-0.66355	-152.427	-6.43982
heptafluorobutanoate												1.41655	-0.244768	-62.3764	-2.76843
heptafluorobutanoate												3.51204	-1	-128.827	-4.56195	3219.47
MnO4	1.522	38.1408	32.4722	30.8938	3.1377	1.6604	1.66041e-10		-0.515038	-4.96976	-118.826	1.65408	-0.690625	-158.432	-6.68954
MnO4	7.70141	1161.92	1074.78	178.623	5.63178	2.98022	2.98022e-10		-1	-5.37603	-148.643	2.90148	-1	-150.512	-5.52192	988.814
dicyanamide	2.54091	60.8151	55.8329	38.2431	3.36912	1.78287	1.78287e-10		-0.672328	-6.04187	-147.555	1.77744	-0.685019	-149.401	-6.17471
dicyanamide	7.33022	1299.65	1373.26	161.642	5.44734	2.88262	2.88262e-10		-1	-5.55805	-152.659	2.8679	-1	-151.918	-5.58658	1251.3
O²⁻	5.5769	1767.16	1490.74	209.322	5.93751	3.14201	3.14201e-10		-2	-10.1984	-284.864	2.64857	-2	-323.586	-12.0984	608.106
S²⁻	15.5406	4501.44	3300.14	366.533	7.15656	3.78711	3.78711e-10		-2	-8.46121	-244.182	3.50701	-2	-257.96	-9.13699	2538.83
Se²⁻	20.6237	5901.67	3847.68	430.389	7.55012	3.99537	3.99537e-10		-2	-8.02017	-233.42	3.71774	-2	-245.726	-8.61909	3270.14
Te²⁻	30.9227	6954.3	4451.73	519.904	8.04095	4.25511	4.25511e-10		-2	-7.5306	-221.258	4.06085	-2	-228.113	-7.89084	4520.23
Po²⁻	37.6112	8518.77	5081.06	572.683	8.30433	4.39448	4.39448e-10		-2	-7.29176	-215.241	4.19748	-2	-221.782	-7.63399	5635.82
SO₃²⁻	1.96922	124.813	1532.57	8.8918	3.65661	1.935	1.935e-10		-0.875286	-7.24734	-181.133	1.86915	-0.907984	-191.03	-7.78294	1585.31
SO₃²⁻	9.72932	1992.07	1532.57	240.178	6.216	3.28938	3.28938e-10		-2	-9.74151	-274.42	3.16568	-2	-280.586	-10.1222
SO₄²⁻	1.33588	68.067	1343.44	39.1432	3.39536	1.79675	1.79675e-10		-0.918161	-8.1873	-200.401	1.77189	-0.926617	-202.542	-8.37864	1488.44
SO₄²⁻	6.51595	1632.29	1343.44	206.212	5.90797	3.12638	3.12638e-10	1.22827e-18	-2	-10.2494	-286.019	3.08812	-2	-286.293	-10.3764
S₂O₃²⁻	1.38493	59.2292	2416.78	36.3586	3.31285	1.7531	1.7531e-10		-0.809032	-7.39385	-179.687	1.73025	-0.822771	-182.892	-7.61868	2586.78
S₂O₃²⁻	6.04057	510.231	2416.78	134.825	5.12771	2.71348	2.71348e-10		-1.04145	-6.14925	-166.796	2.67656	-1.0154	-162.933	-6.07812
S₂O₃²⁻	11.3651	2825.09	2416.78	295.427	6.66014	3.52441	3.52441e-10		-2	-9.09189	-259.26	3.48228	-2	-259.476	-9.20188
HPO₄²⁻	1.25023	83.951	1549.87	43.8344	3.52591	1.86584	1.86584e-10		-1.07268	-9.21098	-227.896	1.82571	-1.06499	-227.877	-9.34592
HPO₄²⁻	7.21211	1814.38	1549.87	295.904	6.66372	3.18958	3.18958e-10	1.27843e-18	-2	-10.0463	-281.407	3.14404	-2	-282.155	-10.1918
C₂O₄²⁻	1.57119	66.8943	1529.23	38.6442	3.38087	1.78909	1.78909e-10		-0.773497	-6.92688	-169.34	1.75364	-0.783321	-172.481	-7.15665
C₂O₄²⁻	7.62184	1806.85	1529.23	206.616	5.91181	3.12841	3.12841e-10		-2	-10.2427	-285.868	3.07301	-2	-287.431	-10.4274	1580.69
CO₃²⁻	1.67596	109.771	1020.1	47.742	3.62772	1.91972	1.91972e-10		-0.992339	-8.28197	-206.54	1.86157	-0.997804	-210.543	-8.58767
CO₃²⁻	6.13585	1245.5	1020.1	167.856	5.51628	2.9191	2.9191e-10		-2	-10.9772	-302.265	2.83851	-2	-306.342	-11.2889	1004.6
SiF₆²⁻	0.719729	1499.14	1210.03	26.4182	2.9783	1.57605	1.57605e-10		-0.671842	-6.82978	-160.673	1.56468	-0.669788	-159.649	-6.85841
SiF₆²⁻	4.95097	1499.14	1210.03	94.1552	5.7905	3.06422	3.06422e-10		-2	-10.4573	-290.705	3.06228	-2	-288.245	-10.4639
tartrate²⁻	0.863912	3862.65	3736.67	28.2007	3.04383	1.61073	1.61073e-10		-0.578884	-5.7581	-136.391	1.61077	-0.579089	-135.307	-5.76
tartrate²⁻	1.85111	3862.65	3736.67	33.3115	3.21759	1.70269	1.70269e-10		-0.73964	-6.95979	-167.679	1.70267	-0.739599	-166.272	-6.95947
tartrate²⁻	1.69152	3862.65	3736.67	33.1373	3.21197	1.69971	1.69971e-10		-0.766448	-7.22467	-173.969	1.69968	-0.766515	-172.535	-7.22542
tartrate²⁻	12.9175	3862.65	3736.67	308.937	6.76015	3.57734	3.57733e-10		-2	-8.95738	-256.074	3.57734	-2	-253.744	-8.95738
succinate²⁻	1.71449	56.3053	46.9605	36.5398	3.31835	1.756	1.756e-10		-0.792793	-7.23345	-175.874	1.72656	-0.797673	-177.581	-7.40209
succinate²⁻	10.7528	3281.76	3341.11	279.908	6.54142	3.46159	3.46159e-10		-2	-9.2569	-263.146	3.4255	-2	-263.025	-9.35442
N³⁻	7.07386	8956.02	12683	576.378	8.32215	4.40392	4.40392e-10		-3	-10.9142	-322.268	3.64474	-3	-374.746	-13.1876	2832.14
P³⁻	43.5268	15284.3	18642.1	836.094	9.42073	4.98526	4.98526e-10		-3	-9.64148	-289.487	4.62136	-3	-306.301	-10.4007
As³⁻	53.2837	18555.4	18300.4	890.035	9.61912	5.09025	5.09025e-10		-3	-9.44263	-284.265	4.75618	-3	-298.768	-10.1059
Sb³⁻	85.7142	20032.4	15060.8	911.931	9.69736	5.13165	5.13165e-10		-3	-9.36644	-282.258	5.06052	-3	-283.054	-9.49809
Bi³⁻	91.8981	19578.9	15078	943.496	9.80799	5.19019	5.19019e-10		-3	-9.2608	-279.467	5.23463	-3	-274.785	-9.18217
PO₄³⁻	1.66588	195.696	2790.35	60.7299	3.93068	2.08004	2.08004e-10		-1.19393	-9.1964	-234.321	1.9885	-1.19466	-240.292	-9.6256
PO₄³⁻	11.0348	3846.11	2790.35	295.904	6.66372	3.52631	3.52631e-10	1.56261e-18	-3	-13.6305	-388.716	3.3937	-3	-397.583	-14.1631	2873.42
AsO₄³⁻	2.34768	229.818	139.549	64.7078	4.01469	2.12449	2.12449e-10		-1.25602	-9.4722	-242.667	2.02946	-1.28166	-253.96	-10.1182
AsO₄³⁻	12.6102	4628.46	3208.43	315.2	6.80553	3.60135	3.60135e-10		-3	-13.3465	-381.982	3.44999	-3	-392.224	-13.932
citrate³⁻	2.72169	65.6783	55.4694	38.2282	3.36869	1.78264	1.78264e-10		-0.870167	-7.82075	-190.992
citrate³⁻	1.63343	44.8023	37.649	33.8275	3.23412	1.71143	1.71143e-10		-0.767569	-7.18568	-173.387
citrate³⁻	0.794562	26.7564	22.9399	28.6336	3.05932	1.61893	1.61893e-10		-0.607306	-6.01021	-142.588
citrate³⁻	19.0679	7576.26	7603.02	429.325	7.54388	3.99207	3.99207e-10		-3	-12.0402	-350.375
aug-cc-pVDZ-X2C
H₃O⁺	0.194121	0.461641	0.168099	1.4086	1.12097	0.593195	5.93195e-11		0.549258	14.8351	-274.628	0.590007	0.546474	-271.629	14.8396
H₃O⁺	0.914887	27.8893	28.3852	25.1995	2.93177	1.55144	1.55144e-10		1	10.3271	-348.582	1.55392	1	-345.466	10.3105
H⁺				0.35	0.70473	0.372929	3.72929e-11		1		-555.46			0
Li⁺	0.026524	0.10984	0.11518	0.878987	0.957916	0.50691	5.0691e-11		1	31.6067	-520.351	0.51183	1	-515.4	31.3029	0.132453
Na⁺	0.071424	1.36771	6.79896	7.83923	1.98651	1.05122	1.05122e-10		1	15.2411	-414.033	1.05953	1	-409.525	15.1215	1.5288
K⁺	0.798563	20.2387	95.3291	35.2269	3.27812	1.73472	1.73472e-10		1	9.23596	-329.496	1.73452	1	-326.793	9.23699	20.4699
Rb⁺	1.25008	49.8958	227.302	61.1972	3.94073	2.08536	2.08536e-10		1	7.68298	-298.255	2.08324	1	-295.91	7.6908	50.3047
Cs⁺	2.55217	168.291	695.153	123.385	4.97837	2.63445	2.63445e-10		1	6.08163	-259.696	2.74671	1	-250.812	5.83307	338.728
NH₄⁺	0.25206	0.568101	0.234876	1.77357	1.21046	0.640549	6.40549e-11		0.423322	10.5884	-207.212
NH₄⁺	1.35351	50.6498	51.2164	31.3551	3.15333	1.66868	1.66868e-10		1	9.60146	-336.127
N(CH₃)₄⁺	0.488562	1.29933	0.583225	3.19664	1.4731	0.779532	7.79532e-11		0.151967	3.12339	-70.0649
N(CH₃)₄⁺	7.94977	1499.35	1593.73	176.634	5.61079	2.96912	2.96912e-10		0.999999	5.39613	-240.728
N(C₂H₅)₄⁺	0.928372	1.42515	0.606986	3.02394	1.44607	0.765233	7.65233e-11		0.16345	3.42217	-75.8124
N(C₂H₅)₄⁺	14.8045	4915.32	5504.65	326.007	6.88244	3.64205	3.64205e-10		0.999999	4.3991	-209.9
N(C₃H₇)₄⁺	0.31089	1.2225	0.593261	3.14565	1.46522	0.775365	7.75365e-11		0.158669	3.27866	-73.2826
N(C₃H₇)₄⁺	21.9777	10614.2	12403.5	481.69	7.83891	4.14819	4.14819e-10		1	3.86235	-191.459
N(C₄H₉)₄⁺	0.5385	1.2338	0.62486	3.19454	1.47277	0.779362	7.79362e-11		0.140043	3.23885	-64.5719
N(C₄H₉)₄⁺	29.1444	18650	22740.3	637.58	8.60687	4.55458	4.55458e-10		1	3.51772	-178.843
PAN⁺	0.52709	0.61595	0.29662	1.96611	1.25276	0.662937	6.62937e-11		0.365369	8.83019	-177.085	0.663105	0.361717	-174.004	8.73971
PAN⁺	6.20134	925.011	1038.76	138.062	5.16843	2.73503	2.73503e-10		1	5.858	-253.689	2.73663	1	-251.394	5.85457
guanidinium⁺	0.45937	0.667258	0.256694	2.05413	1.27119	0.672685	6.72685e-11		0.38271	9.11525	-184.699	0.673751	0.377803	-180.894	8.98414
guanidinium⁺	4.78649	634.873	709.127	118.899	4.91729	2.60213	2.60213e-10		1	6.15718	-261.688	2.59553	1	-259.835	6.17283
bmim⁺	0.955638	1.5974	0.962563	3.20764	1.47478	0.780425	7.80425e-11		0.163629	3.35923	-75.4136
bmim⁺	15.6352	5354.61	6305.6	326.352	6.88486	3.64333	3.64333e-10		1	4.39757	-209.85
bm2im⁺	0.790858	1.25334	0.601518	3.13182	1.46307	0.774227	7.74227e-11		0.174779	3.61686	-80.7616
bm2im⁺	17.3071	6589.21	7723.26	364.992	7.14652	3.78179	3.78179e-10		0.999998	4.23654	-204.463
bmpy⁺	0.503084	1.2846	0.592227	3.23078	1.47832	0.782297	7.82297e-11		0.147486	3.02057	-67.9205
bmpy⁺	16.1463	5850.16	6682.5	351.78	7.05922	3.7356	3.7356e-10		0.999998	4.28893	-206.229
Ph4As(As)												2.13977	0.912796	-266.029	6.83465
Ph4As(tot)												5.04033	0.999999	-164.267	3.17871	33373.8
Ph4P(P)												2.04702	0.708808	-211.822	5.54774
Ph4P(tot)												5.00952	1	-165.032	3.19827	32607.5
CH₃⁺	0.42425	13.5822	18.1589	19.3953	2.68678	1.42179	1.42179e-10		0.323412	3.64444	-117.552	1.39991	0.350824	-127.406	4.01514
CH₃⁺	0.287625	0.710898	0.471508	2.21994	1.30451	0.690319	6.90319e-11		0.225768	5.2399	-108.123	0.718844	0.216485	-101.644	4.82507
CH₃⁺	1.28579	38.5988	39.9498	26.0554	2.9646	1.5688	1.5688e-10		1	10.2127	-346.679	1.56847	1	-343.884	10.2149	41.525
Be²⁺	0.007557	0.0116548	0.00708331	0.32777	0.689482	0.36486	3.6486e-11		2	87.8241	-1115.45	0.367797	2	-1105.99	87.1229	0.0132802
Mg²⁺	0.046085	0.480993	1.37173	4.84202	1.69177	0.895253	8.95253e-11		2	35.7927	-879.562	0.901758	2	-870.566	35.5345	0.5234
Ca²⁺	0.478634	8.4393	26.9004	24.1759	2.89153	1.53014	1.53014e-10		2	20.9416	-701.887	1.53163	2	-695.84	20.9212	8.487
Sr²⁺	0.850279	24.6264	82.027	44.0992	3.533	1.86959	1.86959e-10		2	17.1393	-633.469	1.88801	2	-624.88	16.9721	25.3044
Ba²⁺	1.5423	722.307	656.246	90.1843	4.48446	2.37309	2.37309e-10		2	13.5029	-553.45	2.55326	2	-524.951	12.55	191.63
B³⁺	0.002815	0.00223681	0.00113186	0.156342	0.538714	0.285076	2.85076e-11		3	168.605	-1743.52	0.28701	3	-1729.77	167.469	0.00243259
Al³⁺	0.023709	0.162324	0.398491	3.23159	1.47845	0.782363	7.82363e-11		3	61.4361	-1381.53	0.78668	3	-1368.64	61.0989	0.17566
Ga³⁺	0.147739	1.5845	6.10619	13.6245	2.3884	1.26389	1.26389e-10		3	38.0296	-1150.27	1.26355	3	-1141.25	38.04	1.47458
In³⁺	0.407802	7.16162	29.6251	34.0789	3.24211	1.71566	1.71566e-10		3	28.0156	-994.148	1.71343	3	-986.608	28.0521	6.86657
Tl³⁺	0.708171	15.6816	65.1159	53.3447	3.76441	1.99205	1.99205e-10		3	24.1286	-917.926
Ag⁺	1.30046	48.4208	115.472	58.2642	3.87674	2.05149	2.05149e-10		1	7.80981	-301.012
Tl⁺	0.708171	88.3899	225.288	99.2241	4.62955	2.44986	2.44987e-10		1	6.53986	-271.495
Fe²⁺	0.589078	11.5265	35.3606	22.6344	2.82872	1.4969	1.4969e-10		2	21.4066	-709.39
Co²⁺	0.53054	9.82482	31.7552	21.4028	2.77645	1.46924	1.46924e-10		2	21.8096	-715.756
Ni²⁺	0.494055	8.83642	29.6464	20.55	2.73907	1.44946	1.44946e-10		2	22.1072	-720.379
Cu²⁺	0.469721	4.72977	13.6582	19.6962	2.7006	1.4291	1.4291e-10		2	22.4221	-725.2
Zn²⁺	0.328227	5.01082	14.7395	18.7608	2.65715	1.40611	1.40611e-10		2	22.7888	-730.723
Cd²⁺	0.72699	17.9325	49.8197	42.6412	3.49363	1.84876	1.84876e-10		2	17.3325	-637.282
Hg²⁺	1.08723	33.2269	67.2074	63.9159	3.99825	2.11579	2.11579e-10		2	15.1449	-591.642
Pb²⁺	2.30826	51.7079	120.735	78.373	4.27946	2.2646	2.2646e-10		2	14.1497	-568.935
Water	1.26223	44.2359	45.653	28.3098	3.04775	1.61281	1.61281e-10		-0.79391	-7.88677	-186.887	1.60669	-0.785912	-183.954	-7.83705
Water	1.26223	44.2359	45.653	2.66968	1.38724	0.734102	7.34102e-11		0.396955	8.66354	-186.624	0.725757	0.392956	-183.954	8.67487
Water	1.26223	44.2359	45.653	33.6492	3.22843	1.70842	1.70842e-10		0	0		1.6999	0		0

## Sheet: Fig 2 and 4 Data
Ion	AVG POL	C6 (MCLF)	C6(TSSCS)	r cubed moment	r moment(bohr?)	r moment (A)	r moment (m)	q2(e-)	MetricSho	Electrostatic Potential Energy water	Proton Affinity (kcal/mol)	Proton Affinity (kJ/mol)	CN	Surface Area	ΔG$_{{specific(1:1)-{}}}$ (kJ.mol$^{{-1}}$)	ΔG$_{{specific(1:1)-{}}}$ (kJ.mol$^{{-1}}$) error	Enthalpy of Hydration per water molecule	Viscosity-B Coefficient per water	Diffusion Coefficients	MeOH GFET	DLCST (1M)	SN2 CH3I reaction rate in MeOH	LN(% Activation of Human Rhinovirus-14 3C Protease (0.4M))	Lysozyme c(oC/mol)	DG(specific)	DG(specific kJ/mol)	DG_err	DG(bulk)	DG(bulk)_err	DG(bulk kJ/mol)	minusDG(specific kJ/mol)	minDGSErr	minusDG(bulk kJ/mol)	minDGBErr	ApproxDFTBCN	CN*Specific	Lewis Strength	Surface Tension Increment	Molar conductivities	Molar conductivities (Sm2mol-1)		Conductivity/Diffusion	Viscosity-B Coefficient	NMR B values	Standard Molar Heat Capacities (J.K-1.mol-1)	Enthalpy of Hydration	Entropy of Hydration	Gibbs Energy of Hydration	Gibbs Energy of Hydration per water molecule
F⁻	1.21748	92.1319	57.9774	43.0087	3.50363	1.85405	1.85405e-10	-1	-8.64148	-213.424	-372.56	-1557.3	4.6	4.31971e-19	-87.4771	4.75953	110.87	0.0276087	1.48	20.1	-22.5		1.54756		-20.9275	-87.4771	1.13864	-118.077	6.48965	-493.561	87.4771	4.75953	493.561	27.1268	6.1	533.611	2.88	1.1	55.4	0.00554	0.0342616	0.00374324	0.127	0.14	-45	510	137.2	469	101.957
Cl⁻	4.22028	364.647	291.098	113.591	4.843	2.56282	2.56282e-10	-1	-6.25162	-167.485	-334.1	-1396.54	5.6	8.25364e-19	-45.1713	3.90896	65.5357	-0.000892857	2.03	13.2	-12	-5.5	0.262364	10.3	-10.8065	-45.1713	0.935157	-64.1634	3.91161	-268.203	45.1713	3.90896	268.203	16.3505	6.3	284.579	1.67	1.2	76.4	0.00764	0.0245952	0.00376355	-0.005	-0.01	-55	367	75.7	344	61.4286
Br⁻	5.83534	570.875	458.802	155.462	5.37702	2.84541	2.84541e-10	-1	-5.63074	-154.247	-323.29	-1351.35		1.01742e-18	-36.243	6.43328			2.08	11.1	-7.3	-4.1	-0.162519	-8.7	-8.50412	-35.5472	1.29189	-59.0966	8.24433	-247.024	35.5472	5.40009	247.024	34.4613	6.2	220.393	1.25	0.95	78.1	0.00781	0.0204439	0.00375481	-0.033	-0.04	-61	336	58.8	318
I⁻	9.39521	806.7	742.496	235.366	6.1742	3.26727	3.26727e-10	-1	-4.90372	-137.969	-312.19	-1304.95	8	1.34146e-18	-26.6973	2.40101	36.375	-0.009125	2.05	7.3	-1.2	-2.5	-0.462035	-26.3	-6.38691	-26.6973	0.574404	-39.319	4.55066	-164.353	26.6973	2.40101	164.353	19.0218	6.5	173.532	0.71	0.35	76.4	0.00764	0.0152818	0.00372683	-0.073	-0.08	-50	291	35.9	280	35
OH⁻	2.77193	183.572	155.857	62.3116	3.96451	2.09794	2.09794e-10	-1.23399	-9.4239	-240.651	-397.94	-1663.39	3.7	4.70126e-19	-95.7993	7.52455	140.541	0.032973							-22.9185	-95.7993	0.983671				95.7993	4.11174						1.35	198.3	0.01983		#DIV/0!	0.122	0.18	-69	520	160.8	472	127.568
SH⁻	7.00021	612.616	580.329	144.566	5.24835	2.77732	2.77732e-10	-1.10724	-6.38744	-174.105	-352.73	-1474.41	5.9	7.89016e-19			57.6271	0.00423729	1.73																				65	0.0065		0.00375723	0.025		-22	340	98	311	52.7119
CN⁻(-0.6)	4.03668			41.6049	3.46509	1.83366	1.83366e-10	-0.6	-5.24256	-129.073	-339.72	-1420.03										-3.2															1.01								-65
CN⁻(CM5)	4.03668			41.6049	3.46509	1.83366	1.83366e-10	-0.631922	-5.52148	-135.94	-339.72	-1420.03								9.5
CN⁻(N)	4.03668			41.6049	3.46509	1.83366	1.83366e-10	-0.50942	-4.45111	-109.587	-339.72	-1420.03							2.08																				82	0.0082		0.00394231	-0.024			346	80.4	322
CN(TOT)	4.03668	292.51	268.577	98.6192	4.62013	2.44488	2.44488e-10	-1	-6.5532	-173.707
NCS⁻	7.59843	959.397	997.558	105.919	4.73142	2.50377	2.50377e-10	-0.688212	-4.4039	-117.37	-315.76	-1319.88			-25.1816	6.31533				4.6																	0.35	0.2
NCS⁻(S/N)	7.59843	959.397	997.558		4.04722	2.14171	2.14171e-10	-0.652868	-4.98168	-126.536	-322.52	-1348.13							1.76		-0.4			-31.4	-6.0243	-25.1816	1.51084	-49.3292	4.34745	-206.196	25.1816	6.31533	206.196	18.1723				0.2	66	0.0066		0.00375	-0.032	-0.07	45	311	66	291
SCN⁻	7.59843	959.397	997.558	38.0352	3.36301	1.77964	1.77964e-10	-0.617524	-5.55945	-135.702	-329.28	-1376.39
NCS⁻(tot)	7.59843	959.397	997.558	173.175	5.57393	2.94961	2.94961e-10	-1	-5.43182	-149.879												-3.3
N₃⁻	5.57498	534.378	507.216	42.6748	3.49454	1.84924	1.84924e-10	-0.691448	-5.99068	-147.847	-353.16	-1476.21							1.83	9.1		-4.1																	69	0.0069		0.00377049	-0.018				82.1	278
NO₃⁻	4.1939	540.502	488.164	31.1161	3.1453	1.66443	1.66443e-10	-0.60081	-5.78339	-138.382	-339.57	-1419.4					39.4937	-0.0056962	1.9	12.5	-7.9				-11.6544		1.23721	-66.4947		-277.948								0.45	71.5	0.00715		0.00376316	-0.045	-0.05	0	312	86.4	286	#DIV/0!
NO₃⁻(tot)	4.1939	540.502	488.164	113.369	4.83984	2.56115	2.56115e-10	-1	-6.2557	-167.57	-339.57	-1419.4	7.9		-48.7156	5.17154								-0.9	-11.6544	-48.7156	1.23721	-66.4947	5.38385	-277.948	48.7156	5.17154	277.948	22.5045			1.55
ClO₄⁻	5.07515	942.104	843.604	29.4252	3.08726	1.63372	1.63372e-10	-0.626964	-6.1486	-146.282	-322.8	-1349.3			-38.639	4.76914			1.79						-9.24378		1.14094	-57.6195	6.86439	-240.85							1.52	-0.5	67.4	0.00674		0.00376536	-0.058			425	56.8	229
ClO₄⁻(tot)	5.07515	942.104	843.604	163.879	5.47236	2.89586	2.89586e-10	-1	-5.53264	-152.101	-322.8	-1349.3	10		-38.639	4.76914	42.5	-0.0058	1.79	6.5				-17	-9.24378	-38.639	1.14094	-57.6195	6.86439	-240.85	38.639	4.76914	240.85	28.6931			1.52	-0.5						-0.085	45			229	22.9
ClO(O)⁻	4.42344			37.9901	3.36168	1.77894	1.77894e-10	-0.70295	-6.33103	-154.518	-360.65	-1507.52																																	-135	432	152	387
BrO(O)⁻	5.73872			36.7126	3.32357	1.75877	1.75877e-10	-0.697885	-6.35749	-154.648	-359.4	-1502.29																																	-135		163
IO(O)⁻	2.0648	47.9355	35.381	34.9172	3.26848	1.72961	1.72962e-10	-0.684983	-6.34513	-153.588																																			-197
NCO(N)⁻	4.2025	451.658	423.655	45.8252	3.5785	1.89367	1.89367e-10	-0.883112	-7.47173	-185.631	-349.64	-1461.5																																		399	90	372
NCO⁻(O)	4.2025	451.658	423.655	31.0679	3.14367	1.66357	1.66357e-10	-0.641751	-6.18068	-147.865	-325	-1358.5							1.72																				64.6	0.00646		0.00375581	-0.032
OCN(tot)⁻	4.2025	451.658	423.655	103.813	4.69984	2.48706	2.48706e-10	-1	-6.44205	-171.429
PF₆⁻	4.25806	1046.18	944.521	22.017	2.80276	1.48317	1.48317e-10	-0.487229	-5.26325	-121.412	-340.04	-1421.37							1.52																				56.9	0.00569		0.00374342	-0.21
PF6(tot)⁻	4.25806	1046.18	944.521	172.099	5.56236	2.94349	2.94349e-10	-1	-5.44312	-150.129	-340.04	-1421.37
CH₃COO⁻	5.72212	855.203	866.17	34.6841	3.26119	1.72576	1.72576e-10	-0.766444	-7.11559	-172.123	-363.48	-1519.35			-59.8216	4.64288			1.09	16	-14.9	-5.6	0.593327		-15.8328	-66.1813	5	-105.597	8.7742	-441.397	66.1813	20.9	441.397	36.6762			2.01	0.05	41.4	0.00414		0.00379817	0.246		97	425	169.4	374
CF3SO3⁻		1751.17	1582.75	19.7216	2.70176	1.42972	1.42972e-10	-0.243446	-2.72811	-62.1655	-324.12	-1354.82
HCO₃⁻(O)	4.30504	601.846	566.437	33.8768	3.23569	1.71226	1.71226e-10	-0.806466	-7.54615	-182.112			5.5		-63.0087	8.56259	69.8182	0.0236364	1.19						-15.0738	-63.0087	2.04847	-110.4	8.45013	-461.473	63.0087	8.56259	461.473	35.3216					44.5	0.00445		0.0037395	0.13		19	384	137.3	343	62.3636
HSO₄⁻(O)	1.081	36.8398	31.3527	31.7013	3.16489	1.6748	1.6748e-10	-0.78056	-7.46714	-179.008	-335.3	-1401.55	8		-47.0627	11.1323	46	0.015875	1.33						-7.97932	-33.3536	2.42489				33.3536	10.1361							50	0.005		0.0037594	0.127		53	368	129	330	41.25
HSO₄⁻(TOT)	5.37997	1033.76	951.572	171.865	5.55984	2.94216	2.94216e-10	-1	-5.44559	-150.184
H₂PO₄⁻	5.7033	1149.21	1092.78	34.724	3.26245	1.72642	1.72642e-10	-0.938137	-8.70623	-210.624					-61.0725	5.01581			0.88						-14.2	-59.356	3.69786	-135.824	10.8683	-567.745	59.356	15.4571	567.745	45.4296					33	0.0033		0.00375	0.34		37	522	166	473
I3⁻	11.1814	620.836	627.941	187.662	5.72521	3.02967	3.02967e-10	-0.476366	-2.51916	-69.8773																											-0.41		42.5	0.00425		#DIV/0!			126	173	73.2	151
I3(avg)⁻	25.0095								-3.12125	-89.7261																																				173
I3(tot)⁻	25.0095	5154.13	5126.83	537.682	8.13158	4.30307	4.30307e-10	-1	-3.72334	-109.575
BO₂⁻	3.57775	426.543	375.557	36.694	3.32301	1.75847	1.75847e-10	-0.917087	-8.35576	-203.246									0.81																				30.6	0.00306		0.00377778			-101	538	230.8	469
ClO₂⁻	4.70336	643.412	554.313	36.2642	3.30999	1.75158	1.75158e-10	-0.694573	-6.35329	-154.36	-344.3	-1439.17							1.39																				52	0.0052		0.00374101	0.067			475	133.5	435
NO₂⁻	3.73498	431.482	354.649	35.7887	3.29545	1.74389	1.74389e-10	-0.549249	-5.04616	-122.443	-352.77	-1474.58							1.91																				71.8	0.00718		0.00375916	-0.024		-23	412	93.7	384
NO2(tot)⁻	3.73498	431.482	354.649	102.229	4.67582	2.47435	2.47435e-10	-0.999999	-6.47513	-172.109
ClO₃⁻	4.95157	824.578	719.917	32.9068	3.20451	1.69576	1.69576e-10	-0.643908	-6.08372	-146.393	-334.03	-1396.25							1.72																		1.38		64.6	0.00646		0.00375581	-0.022		14	299	79.8	275
BrO₃⁻	5.90068	1032.51	918.137	34.2848	3.24863	1.71911	1.71911e-10	-0.710285	-6.61971	-159.944									1.48																		2.01		55.7	0.00557		0.00376351	0.009		-19	376	94.8	348
IO₃⁻	7.3194	50.0089	37.2635	33.0156	3.20804	1.69763	1.69763e-10	-0.753437	-7.11073	-171.162									1.08																				40.5	0.00405		0.00375	0.14		0	450	147.6	406
BF4⁻	2.97079	466.66	420.341	23.2439	2.85388	1.51022	1.51022e-10	-0.54799	-5.81358	-134.905																											1.56		37.7	0.00377					-48			207
BF4(B)⁻	2.97079	466.66	420.341	18.9884	2.66786	1.41178	1.41178e-10	1.19196
BF4(BF)⁻	2.97079	466.66	420.341
HCO₂⁻	4.06587	473.263	425.376	35.0289	3.27197	1.73146	1.73146e-10	-0.721141	-6.67296	-161.574									1.45																			0.15	54.6	0.00546		0.00376552	-0.052		-14	432	124	395
Pic(whole)⁻	21.9077	7877.2	8122.47	423.548	7.5099	3.97409	3.97409e-10	-1	-4.03156	-117.238
O²⁻	5.5769	1767.16	1490.74	209.322	5.93751	3.14201	3.14201e-10	-2	-10.1984	-284.864
S²⁻	15.5406	4501.44	3300.14	366.533	7.15656	3.78711	3.78711e-10	-2	-8.46121	-244.182	-499.78	-2089.08																											191	0.0191		#DIV/0!			-184	1348	122.3	1312
SO₃²⁻	9.72932	1992.07	1532.57	44.0645	3.53207	1.8691	1.8691e-10	-0.907569	-7.77959	-192.575			12.5				110.08	0.02256	1.06				0.788457																159.8	0.01598		0.0150755	0.282		-120	1376	249.3	1302	104.16
SO3(tot)	9.72932	1992.07	1532.57	214.089	5.98225	3.16569	3.16569e-10	-2	-10.1221	-283.133			12.5
SO₄²⁻	6.51595	1632.29	1343.44	39.1432	3.39536	1.79675	1.79675e-10	-0.918161	-8.1873	-200.401	-471.91	-1972.58	11.3				91.5929	0.0182301							-15.74	-65.7932	3.03				65.7932													0.12
SO₄²⁻(tot)	6.51595	1632.29	1343.44	206.212	5.90797	3.12638	3.12638e-10	-2	-10.2494	-286.019	-471.91	-1972.58	11.3	1.22827e-18	-84.6871	7.44683			1.07	34			1.91692		-23.5	-98.23	0.509866	-227.687	8.08852	-951.733	98.23	2.13124	951.733	33.81			2.91		160	0.016	0.00871147	0.0149533	0.206		-134	1035	200.4	975	86.2832
S₂O₃²⁻	11.3651	2825.09	2416.78	34.9652	3.26998	1.73041	1.73041e-10	-0.822602	-7.61643	-184.385									1.13																			1.45	169.8	0.01698		0.0150265			-106
HPO₄²⁻	7.21211	1814.38	1549.87	43.8344	3.52591	1.86584	1.86584e-10	-1.07268	-9.21098	-227.896					-101.514	19.1532			0.44						-24.6001	-102.828	2.96155	-272.923	9.90158	-1140.82	102.828	12.3793	1140.82	41.3886					66	0.0066		0.015	0.382		-111		272.1	1366
HPO₄²⁻(tot)	7.21211	1814.38	1549.87	295.904	6.66372	3.18958	3.18958e-10	-2	-10.0463	-281.407				1.27843e-18
C₂O₄²⁻	7.62184			38.6442	3.38087	1.78909	1.78909e-10	-0.773497	-6.92688	-169.34																													148.3	0.01483			0.174					1200
C₂O₄⁻(tot)	7.62184			206.616	5.91181	3.12841	3.12841e-10	-2	-10.2427	-285.868									0.99																				148.3	0.01483		0.0149798
CO₃²⁻	6.13585	1245.5	1020.1	47.742	3.62772	1.91972	1.91972e-10	-0.992339	-8.28197	-206.54	-503.32	-2103.88	8.9					0.0330337	0.92						-26.8202		0.509866											0.95	138.6	0.01386		0.0150652	0.294		-158	1397	245.2	1312	147.416
CO₃²⁻(tot)	6.13585	1245.5	1020.1	167.856	5.51628	2.9191	2.9191e-10	-2	-10.9772	-302.265	-503.32	-2103.88	8.9		-106.867	7.77807	156.966								-26.8202	-112.109	0.509866	-264.373	8.38095	-1105.08	112.109	2.13124	1105.08	35.0324			3.75							0.25
PO₄³⁻	11.0348	3846.11	2790.35	60.7299	3.93068	2.08004	2.08004e-10	-1.19393	-9.1964	-234.321	-600.84	-2511.51	13					0.0380769							-32.8631		2.60904
PO₄³⁻(tot)	11.0348	3846.11	2790.35	295.904	6.66372	3.52631	3.52631e-10	-3	-13.6305	-388.716	-600.84	-2511.51	13	1.56261e-18	-135.503	12.2109	221.462		0.61						-32.8631	-137.368	2.60904	-448.213	25.6837	-1873.53	137.368	10.9058	1873.53	107.358	15	2060.51	4.46	2	207	0.0207	0.00390373	0.0339344	0.495		-282	2879	421.8	2753	211.769
aug-cc-pvqz(-x2c)											Pauling RADIUS TEST - these vary wildly
H⁺				0.35	0.70473	0.372929	3.72929e-11	1			-0.04									8.7							55.002	-347.725	8.13566	-1453.49			1453.49	34.0071				-1.35	349.8	0.03498		#DIV/0!	0.068	0.06	-71	1103	131.1	1064
Li⁺	0.021042	0.10984	0.11518	0.878987	0.957916	0.50691	5.0691e-11	1	31.6067	-520.549	0.68		4.2		-140.903	7.26997	126.429	0.0347619	1.03	3	-7.5				-33.7088	-140.903	1.73923	-184.791	8.08977	-772.428	140.903	7.26997	772.428	33.8152	3.8	535.431	1.24	0.65	38.7	0.00387		0.00375728	0.146	0.14	-9	531	141.8	489	116.429
Na⁺	0.1264	1.36771	6.79896	7.83923	1.98651	1.05122	1.05122e-10	1	15.2411	-414.159	0.95		5.4		-74.5155	7.65264	77.037	0.0157407	1.33	7	-12.4				-17.8267	-74.5155	1.83077	-131.712	5.14713	-550.558	74.5155	7.65264	550.558	21.515	6.15	458.27	0.89	0.9	50.1	0.00501		0.00376692	0.085	0.06	-29	416	111.2	383	70.9259
K⁺	0.798563	20.2387	95.3291	35.2269	3.27812	1.73472	1.73472e-10	1	9.23596	-329.576	1.33		8.3		-45.6142	4.93258	40.241	-0.00108434	1.96	8.4	-11.8				-10.9125	-45.6142	1.18004	-78.3194	9.36192	-327.375	45.6142	4.93258	327.375	39.1328	5.5	250.878	0.85	0.8	73.5	0.00735		0.00375	-0.009	-0.01	-59	334	74.3	312	37.5904
Rb⁺	1.25008	49.8958	227.302	61.1972	3.94073	2.08536	2.08536e-10	1	7.68298	-298.32	1.46		7.1				43.3803	-0.00464789	2.07	9.6																	0.92	0.65	77.8	0.00778		0.00375845	-0.033	-0.04	-80	308	65.1	289	40.7042
Cs⁺	2.31374	168.291	695.153	123.385	4.97837	2.63445	2.63445e-10	1	6.08163	-259.745	1.69		7.8				36.2821	-0.00602564	2.06	8.7	-10.4																1.11	0.5	77.3	0.00773		0.00375243	-0.047	-0.05	-94	283	58.6	266	34.1026
NH₄(H)⁺	1.35736	49.4688	50.4464	1.67749	1.18819	0.628767	6.28767e-11	0.438708	11.1788	-215.95			4.6												-13.6324	-56.9832	3.15951	-100.512	6.00483	-420.141	56.9832	13.2068	420.141	25.1002				0.4
NH₄(tot)⁺	1.35736	49.4688	50.4464	31.366	3.1537	1.66887	1.66887e-10	1	9.60035	-336.19					-56.9832	13.2068			1.96	11.3	-7.6																0.98	0.4	73.6	0.00736		0.0037551	-0.008			329	111.6	301
Me₄N⁺	7.72971	1499.35	1593.73	3.19638	1.47306	0.779512	7.79512e-11	0.151448	3.1128	-69.8498															-4.48259	-18.7372	0.523742	-57.7622	1.79206	-241.446	18.7372	2.18924	241.446	7.49079				-0.4
Me₄N(tot)⁺	7.72971	1499.35	1593.73	176.634	5.61079	2.96912	2.96912e-10	1	5.39613	-240.77			24		-18.7372	2.18924			1.2	7																		-0.4	44.9	0.00449		0.00374167	0.123		166	209	144.1	166
Et₄N⁺	14.2557	5070.41	5676.12	3.17216	1.46933	0.777539	7.77539e-11	0.152991	3.15249	-70.6197
Et₄N(tot)⁺	14.2557	5070.41	5676.12	330.797	6.91599	3.6598	3.6598e-10	1	4.37777	-209.226									0.87	1																			32.7	0.00327		0.00375862	0.385	0.44	443	193	222	127
Pr₄N⁺	21.9777	10614.2	12403.5	3.14565	1.46522	0.775366	7.75366e-11	0.158669	3.27866	-73.3073
Pr₄N(tot)⁺	21.9777	10614.2	12403.5	481.69	7.83892	4.1482	4.1482e-10	1	3.86234	-191.486									0.63	-8.8																			23.4	0.00234		0.00371429	0.916		852	210	327	113
Bu₄N⁺	29.1444	18650	22740.3	3.19454	1.47277	0.779362	7.79362e-11	0.140043	2.87894	-64.5937
Bu₄N(tot)⁺	29.1444	18650	22740.3	637.58	8.60686	4.55458	4.55458e-10	1	3.51773	-178.867									0.52	-23.1																			19.5	0.00195		0.00375	1.275		1268	214	418	89
Pe₄N⁺								1											0.47																				17.9	0.00179		0.00380851			1603
guanidinium(H)⁺	4.78649	633.935	702.404	1.94317	1.24787	0.660349	6.60349e-11	0.387564	9.4033	-188.123									1.06						-10.1605	-42.4711	1.06184	-73.2626	5.46474	-306.238	42.4711	4.43849	306.238	22.8426					39.6	0.00396		0.00373585	0.058		103	170	102	140
guanidinium(tot)⁺	4.78649	633.935	702.404	117.996	4.90482	2.59553	2.59553e-10	1	6.17283	-262.148																																	0.058
Be²⁺	0.007557	0.0116548	0.00708331	0.32777	0.689482	0.36486	3.6486e-11	2	87.8241	-1115.91			4				627.5	0.1125	0.6																				90	0.009		0.015	0.45			2510	310.4	2417	604.25
Mg²⁺	0.046085	0.480993	1.37173	4.84202	1.69177	0.895253	8.95253e-11	2	35.7927	-879.845			6		-298.096	12.1593	324.833	0.0641667	0.71	2					-71.3148	-298.096	2.90892	-467.283	24.2025	-1953.24	298.096	12.1593	1953.24	101.166	6	1788.58	4.66	1.65	106.1	0.01061		0.0149437	0.385	0.5	-158	1949	331.2	1837	306.167
Ca²⁺	0.468705	8.4393	26.9004	24.1759	2.89153	1.53014	1.53014e-10	2	20.9416	-702.067			7		-206.488	14.7416	228.857	0.0425714	0.79	11.2					-49.3991	-206.488	3.52669	-385.91	18.8773	-1613.1	206.488	14.7416	1613.1	78.907	7.4	1528.01	3.54	1.5	118.9	0.01189		0.0150506	0.298	0.27	-169	1602	252.4	1527	218.143
Sr²⁺	0.86406	24.6264	82.027	45.308	3.56499	1.88652	1.88652e-10	2	16.9855	-630.55			9				163.333	0.0302222	0.79	7.1																	3.24	1.2	118.9	0.01189		0.0150506	0.272	0.23	-179	1470	241.7	1398	155.333
Ba²⁺	1.55223	722.307	656.246	141.76	5.21416	2.75923	2.75923e-10	2	11.6132	-504.662			9.3				143.226	0.0246237	0.85	16.9																	2.93	0.9	127.3	0.01273		0.0149765	0.229	0.18	-190	1332	208.2	1270	136.559
Water(O)	1.26223			28.3098	3.04775	1.61281	1.61281e-10	-0.79391	-7.88677	-186.887								0
Water(H)	1.26223			2.66968	1.38724	0.734102	7.34102e-11	0.396955	8.66354	-186.624								0
Zn	0.328227	5.01082	14.7395	18.7608	2.65715	1.40611	1.40611e-10	2	22.7887	-730.918										27.4
[truncated: 165 more columns]

## Sheet: Fig 3 a + outliers
Ion	MetricSho	r(A)	q(a.u.)	1/sho	C6 DISP (MCLF)	Dual param	proton affinity	POL	Lewis Basicity	MeOH	MeOH - sho est	MeOH - Diff	proton aff est	DIFF	POL est	diff	LB est	diff	EQN (AN/Sho) est	diff	EtOH	EtOH - sho est	EtOH - Diff	proton aff est	DIFF	POL est	diff	LB est	diff	EQN (AN/Sho) est	diff	1-PrOH	1-PrOH - sho est	1-PrOH - Diff	proton aff est	DIFF	POL est	diff	LB est	diff	EQN (AN/Sho) est	diff	1-BuOH	1-BuOH - sho est	1-BuOH - Diff	proton aff est	DIFF	POL est	diff
Fill_for_python					c1	c2		(M06-2X/aug-cc-pvdz) - AVG	POL(m06-2x/aug-cc-pvdz)	3.09749											4.93126											6.73007											8.57688
Fill_for_python					1000	1			sho+	7.70011											7.78285											7.79966											7.82608
Fill_for_python									sho-	-5.03657	3.93197										-5.47518	3.89017										-5.45717	3.88179										-5.43439
Fill_for_python									LN(AN1-AN2)	2.58776											2.87356											3.04927											2.89037
Fill_for_python									water AN - AN	13.3											17.7											21.1											18
Fill_for_python									AN	41.5											37.1											33.7											36.8
Ion	MetricSho	r	q	1/sho	C6 DISP (MCLF)	Dual param	proton affinity	POL(MP2/aug-cc-pVQZ) - AVG	Lewis Basicity	MeOH	MeOH - sho est	MeOH - Diff	proton aff est	DIFF	POL est	diff	LB est	diff	EQN (AN/Sho) est	diff	EtOH	est	DIFF	proton aff est	DIFF	POL est	diff	LB est	diff	EQN (AN/Sho) est	diff	1-PrOH	est	DIFF	proton aff est	DIFF	POL est	diff	LB est	diff	EQN (AN/Sho) est	diff	1-BuOH	est	DIFF	proton aff est	DIFF	POL est	diff
F⁻	-8.64148	1.85405	-1	-0.115721	92.1319	-8549.35	#N/A	1.21748	#N/A	20.1	23.9399	3.8399	#VALUE!	#VALUE!	16.9758	-3.12422	#VALUE!	#VALUE!	23.2302	3.13025		32.1937	32.1937	#VALUE!	#VALUE!	24.85	24.85	#VALUE!	#VALUE!	33.496	33.496
Cl⁻	-6.25162	2.56282	-1	-0.159959	364.647	-5886.97	#N/A	4.22028	#N/A	13.2	13.4217	0.221666	#VALUE!	#VALUE!	13.1775	-0.0225474	#VALUE!	#VALUE!	13.9697	0.769653	20.3	20.8749	0.574852	#VALUE!	#VALUE!	20.6738	0.373807	#VALUE!	#VALUE!	19.2175	-1.0825	26	25.7217	-0.278303	#VALUE!	#VALUE!	25.3363	-0.66365	#VALUE!	#VALUE!	23.4859	-2.51406	29	28.3629	-0.63714	#VALUE!	#VALUE!	27.9141	-1.08586
Br⁻	-5.63074	2.84541	-1	-0.177597	570.875	-5059.86	#N/A	5.83534	#N/A	11.1	10.689	-0.410973	#VALUE!	#VALUE!	11.1345	0.0345226	#VALUE!	#VALUE!	11.5637	0.463748	19	17.9342	-1.06579	#VALUE!	#VALUE!	18.4277	-0.572341	#VALUE!	#VALUE!	15.5079	-3.49206	22	22.516	0.515981	#VALUE!	#VALUE!	23.0161	1.01612	#VALUE!	#VALUE!	18.5961	-3.4039	24	25.1813	1.18127	#VALUE!	#VALUE!	25.6626	1.66258
I⁻	-4.90372	3.26727	-1	-0.203927	1005.74	-3897.99	#N/A	8.87622	#N/A	7.3	7.48931	0.189308	#VALUE!	#VALUE!	7.28802	-0.0119752	#VALUE!	#VALUE!	8.74661	1.44661	14	14.4909	0.490937	#VALUE!	#VALUE!	14.1985	0.198534	#VALUE!	#VALUE!	11.1643	-2.83569	19	18.7623	-0.237678	#VALUE!	#VALUE!	18.6475	-0.352474	#VALUE!	#VALUE!	12.8705	-6.12953	22	21.4559	-0.544133	#VALUE!	#VALUE!	21.4233	-0.576718
CH₃COO⁻	-7.11559	1.72576	-0.766444	-0.140537	855.203	-6260.38	#N/A	5.72212	#N/A	16	17.2241	1.22414	#VALUE!	#VALUE!	11.2777	-4.72227	#VALUE!	#VALUE!	17.3175	1.31748		24.9668	24.9668	#VALUE!	#VALUE!	18.5851	18.5851	#VALUE!	#VALUE!	24.3794	24.3794
NO₃⁻	-5.77906	1.66436	-0.600334	-0.173038	540.502	-5238.56	#N/A	4.1939	#N/A	12.5	11.3418	-1.15816	#VALUE!	#VALUE!	13.2108	0.710818	#VALUE!	#VALUE!	12.1385	-0.361492	14	18.6367	4.63672	#VALUE!	#VALUE!	20.7105	6.71049	#VALUE!	#VALUE!	16.3941	2.39414
NCS⁻	-4.40391	2.50377	-0.688212	-0.227071	959.397	-3444.51	#N/A	7.59843	#N/A	4.6	5.28951	0.689513	#VALUE!	#VALUE!	8.90434	4.30434	#VALUE!	#VALUE!	6.80984	2.20984	-3.6	12.1237	15.7237	#VALUE!	#VALUE!	15.9756	19.5756	#VALUE!	#VALUE!	8.17808	11.7781
OH⁻	-9.42391	2.09794	-1.23399	-0.106113	183.572	-9240.34	#N/A	2.77193	#N/A
CF₃COO⁻	-6.2748	1.68002	-0.657966	-0.159368	1145.86	-5128.94	#N/A	5.47954
NCS⁻	-4.98168	2.1417	-0.652868	-0.203472	959.397	-4022.28	#N/A	7.59843	#N/A
SCN⁻	-5.55945	1.77964	-0.617524	-0.179874	959.397	-4600.06	#N/A	7.59843	#N/A
I₃⁻	-3.72334	4.30307	-1	-0.268576	5154.13	1430.79		25.0095	#N/A	-12.6	2.29419	14.8942	#VALUE!	#VALUE!	-13.1193	-0.519348	#VALUE!	#VALUE!	4.17266	16.7727
N₃⁻	-5.99068	1.84924	-0.691448	-0.166926	534.378	-5456.3	#N/A	5.57498	#N/A	9.1	12.2732	3.17321	#VALUE!	#VALUE!	11.4639	2.36386	#VALUE!	#VALUE!		-9.1
CF₃SO₃⁻	-2.76296	1.42977	-0.246565	-0.36193	1751.17	-1011.8		6.68309			-1.9326	-1.9326	#VALUE!	#VALUE!	10.0622	10.0622	#VALUE!	#VALUE!	0.451258	0.451258
CN⁻	-5.52148	1.83366		-0.181111	292.51	-5228.97	#N/A	4.03668	#REF!		10.2082	10.2082	#VALUE!	#VALUE!	13.4097	13.4097	#VALUE!	#VALUE!	11.1404	11.1404
CN⁻	-5.24256	1.83366	-0.6	-0.190747	292.51	-4950.05	#N/A	4.03668	#N/A													16.0957	16.0957	#VALUE!	#VALUE!	20.9292	20.9292	#VALUE!	#VALUE!	13.1887	13.1887
Pic⁻	-4.03156	0	0	-0.248043		-4031.56		21.9077		-3.6	3.65076	7.25076	#VALUE!	#VALUE!	-9.1958	-5.5958	#VALUE!	#VALUE!	5.36703	8.96703	-0.2	10.3602	10.5602	#VALUE!	#VALUE!	-3.92501	-3.72501	#VALUE!	#VALUE!	5.95346	6.15346	1.7	14.2592	12.5592	#VALUE!	#VALUE!	-0.0737195	-1.77372	#VALUE!	#VALUE!	6.0017	4.3017		16.9867	16.9867	#VALUE!	#VALUE!	3.25613	3.25613
ClO₄⁻	-6.1486	1.63372	-0.626964	-0.162639	942.104	-5206.5	#N/A	5.07515	#N/A																																			27.835	27.835	#VALUE!	#VALUE!	26.7224	26.7224
ClO₄⁻	-5.53264	2.89586	-1	-0.180746	942.104	-4590.54	#N/A	5.07515	#N/A		10.2573	10.2573	#VALUE!	#VALUE!	12.0961	12.0961	#VALUE!	#VALUE!	11.1836	11.1836		17.4696	17.4696	#VALUE!	#VALUE!	19.4849	19.4849	#VALUE!	#VALUE!	14.9219	14.9219		22.0095	22.0095	#VALUE!	#VALUE!	24.1082	24.1082	#VALUE!	#VALUE!	17.8235	17.8235		24.6786	24.6786	#VALUE!	#VALUE!	26.7224	26.7224
S₂O₃²⁻	-9.09189	3.52441	-2	-0.109988	2825.09	-6266.8		11.3651														34.3269	34.3269	#VALUE!	#VALUE!	10.7371	10.7371	#VALUE!	#VALUE!	36.1871	36.1871
SO₄²⁻	-8.1873	1.79675	-0.918161	-0.12214	1632.29	-6555	#N/A	6.51595	#N/A												23	30.0426	7.0426	#VALUE!	#VALUE!	17.4811	-5.5189	#VALUE!	#VALUE!	30.7825	7.78246
SO₄²⁻	-10.2494	3.12637	-2	-0.0975666	1632.29	-8617.12	#N/A	6.51595	#N/A	34	31.0167	-2.98327	#VALUE!	#VALUE!	10.2736	-23.7264	#VALUE!	#VALUE!	29.4609	-4.53908
CO₃²⁻	-10.9772	2.9191	-2	-0.091098	1245.5	-9731.69		6.13585	#N/A
CO₃²⁻	-8.28197	1.92013	-0.992057	-0.120744	1245.5	-7036.47		6.13585	#N/A
Fill_for_python
Fill_for_python
Fill_for_python
Fill_for_python
Fill_for_python
Fill_for_python
Fill_for_python
Fill_for_python
Fill_for_python
Fill_for_python
Fill_for_python								sho		-4.40119	-14.0929		#VALUE!	#VALUE!	-1.26493	18.5158	#VALUE!	#VALUE!	#VALUE!	#VALUE!	-4.7362	-8.73409		#VALUE!	#VALUE!	-1.39075	26.5432	#VALUE!	#VALUE!	#VALUE!	#VALUE!	-5.16313	-6.55626		#VALUE!	#VALUE!	-1.43662	31.3993	#VALUE!	#VALUE!	#VALUE!	#VALUE!	-5.12427	-3.67215		#VALUE!	#VALUE!	-1.3941	33.7976
Fill_for_python										0.528101	2.9692		#VALUE!	#VALUE!	0.0128427	0.0847519	#VALUE!	#VALUE!	#VALUE!	#VALUE!	1.36954	7.70012		#VALUE!	#VALUE!	0.212916	1.40508	#VALUE!	#VALUE!	#VALUE!	#VALUE!	0.663036	3.72786		#VALUE!	#VALUE!	0.378007	2.49455	#VALUE!	#VALUE!	#VALUE!	#VALUE!	1.51794	8.53447		#VALUE!	#VALUE!	0.618495	4.08159
Fill_for_python										0.985807	0.503857		#VALUE!	#VALUE!	0.999897	0.0429372	#VALUE!	#VALUE!	#VALUE!	#VALUE!	0.922836	1.30667		#VALUE!	#VALUE!	0.977099	0.711844	#VALUE!	#VALUE!	#VALUE!	#VALUE!	0.983777	0.632597		#VALUE!	#VALUE!	0.93525	1.2638	#VALUE!	#VALUE!	#VALUE!	#VALUE!	0.91933	1.44825		#VALUE!	#VALUE!	0.835543	2.06782
Fill_for_python										69.4554	1		#VALUE!	#VALUE!	9701.03	1	#VALUE!	#VALUE!	#VALUE!	#VALUE!	11.9594	1		#VALUE!	#VALUE!	42.6663	1	#VALUE!	#VALUE!	#VALUE!	#VALUE!	60.6391	1		#VALUE!	#VALUE!	14.4439	1	#VALUE!	#VALUE!	#VALUE!	#VALUE!	11.3961	1		#VALUE!	#VALUE!	5.08061	1
Fill_for_python										17.6328	0.253872		#VALUE!	#VALUE!	17.8848	0.0018436	#VALUE!	#VALUE!	#VALUE!	#VALUE!	20.4193	1.70738		#VALUE!	#VALUE!	21.6199	0.506722	#VALUE!	#VALUE!	#VALUE!	#VALUE!	24.2665	0.400179		#VALUE!	#VALUE!	23.0695	1.59718	#VALUE!	#VALUE!	#VALUE!	#VALUE!	23.9026	2.09743		#VALUE!	#VALUE!	21.7241	4.27589
Fill_for_python
Fill_for_python										11	COUNT(AO4:AO109)	13	COUNT(AO4:AO109)	0	COUNT(AO4:AO109)	13	COUNT(AO4:AO109)	0	COUNT(AO4:AO109)	13	7	COUNT(AO4:AO109)	11	COUNT(AO4:AO109)	0	COUNT(AO4:AO109)	11	COUNT(AO4:AO109)	0	COUNT(AO4:AO109)	11	4	COUNT(AO4:AO109)	5	COUNT(AO4:AO109)	0	COUNT(AO4:AO109)	5	COUNT(AO4:AO109)	0	COUNT(AO4:AO109)	5	3	COUNT(AO4:AO109)	6	COUNT(AO4:AO109)	0	COUNT(AO4:AO109)	6
Fill_for_python											MAE	4.26538	MAE	#VALUE!	MAE	4.3829	MAE	#VALUE!	MAE	5.178		MAE	14.3732	MAE	#VALUE!	MAE	11.4311	MAE	#VALUE!	MAE	13.6281		MAE	7.12014	MAE	#VALUE!	MAE	5.58284	MAE	#VALUE!	MAE	6.83455		MAE	11.9771	MAE	#VALUE!	MAE	10.0043
Fill_for_python											RMSE	6.29986	RMSE	#VALUE!	RMSE	6.29804	RMSE	#VALUE!	RMSE	7.40776		RMSE	18.5481	RMSE	#VALUE!	RMSE	14.5806	RMSE	#VALUE!	RMSE	18.1563		RMSE	11.3362	RMSE	#VALUE!	RMSE	10.8254	RMSE	#VALUE!	RMSE	8.85055		RMSE	16.7056	RMSE	#VALUE!	RMSE	15.5083
Fill_for_python
Fill_for_python										-5.72449	-24.5677										-6.14617	-22.0508										-10.5305	-37.6299										-5.12427	-3.67215
Fill_for_python										0.707443	4.4945										1.8756	10.7724										2.68737	14.1622										1.51794	8.53447
Fill_for_python										0.879158	4.43427										0.682301	6.36796										0.884758	4.45194										0.91933	1.44825
Fill_for_python										65.4773	9										10.7382	5										15.3547	2										11.3961	1
Fill_for_python										1287.46	176.965										435.442	202.755						2	2	2	2	304.328	39.6396	2	2	2	2	2	2	2	2	2	23.9026	2.09743	2	2	2	2	2
Fill_for_python
Fill_for_python
Fill_for_python
Fill_for_python
Fill_for_python	MAE	RMSE	Count
MeOH	4.26538	6.29986	13
EtOH	14.3732	18.5481	11
1-PrOH	7.12014	11.3362	5
1-BuOH	11.9771	16.7056	6
TFE	0.478449	0.507996	3
EG	0.213513	0.318599	6
ACE	9.52805	18.0341	5
PC	16.575	30.2522	10
NH3	0.757816	0.804615	3
FA	3.92506	5.57419	11
NMF	4	4	1
DMF	18.4076	33.6349	11
DMA	5.08763	6.01956	7
DEA	#DIV/0!	#DIV/0!	0
NMPy (N‐Methylpyrrolidinone)	6.52957	14.0162	6
MeCN	15.6355	27.9047	13
MeNO2	9.06273	14.239	8
PhNO2	15.9907	25.7042	9
Py	9.28984	13.3666	6
1-CNPy	#DIV/0!	#DIV/0!	0
DMSO	8.58903	12.3298	9
TMS	2.28519	5.01026	6
HMPT	8.0956	17.7761	6
1,1DCE	11.54	21.4005	4
1,2DCE	30.0547	46.502	6
BPh₄⁻										-22.7											-21.3											-25											-20
Data from Marcus "Ions in Solution and their Solvation"
[truncated: 236 more columns]

## Sheet: Fig 3 b
Ion	AN	Slope	Slope error	y-int	y-int error
1-CNPy		71.2326	6.95961	433.577	40.7614
TFE	53.8	1.44187	0.922211	-0.598878	5.18505
EG	43.4	-3.22721	0.263635	-11.7341	1.98989
1-BuOH	36.8	-5.12427	1.51794	-3.67215	8.53447
MeOH	41.5	-5.72449	0.707443	-24.5677	4.4945
EtOH	37.1	-6.14617	1.8756	-22.0508	10.7724
FA	39.8	-6.62431	0.700397	-28.659	4.11697
NMF	32.1	-8.37614	0.160687	-31.793	1.2302
1-PrOH	33.7	-10.5305	2.68737	-37.6299	14.1622
MeNO2	20.5	-17.1777	2.08791	-69.076	12.2391
DMSO	19.3	-17.7344	1.95406	-75.945	11.4545
Py	14.2	-19.5303	5.03883	-84.7738	26.2701
HMPT	10.6	-19.8384	1.22643	-67.244	6.72003
1,1DCE	16.2	-19.9316	2.19104	-67.5245	12.3189
MeCN	18.9	-21.2734	1.50005	-91.6893	8.21131
1,2DCE	16.7	-19.9705	1.33614	-73.4086	7.51231
PhNO2	14.8	-20.235	2.92139	-88.0912	14.721
PC	18.3	-20.1405	1.97655	-87.0169	10.0294
NMPy	13.3	-21.744	1.00034	-86.9006	6.09268
DMA	13.6	-22.456	2.53835	-88.7054	14.8796
DMF	16	-22.8465	2.45211	-91.4713	15.1663
ACE	12.5	-24.0432	1.62581	-94.8948	10.2247
TMS	19.2	-23.5652	1.58222	-98.3122	8.4072
water	54.8	0

## Sheet: Cation GFET
Ion	MetricSho	Electrostatic Potential Energy water	POL	MeOH	EtOH	1‐PrOH	1‐BuOH	TFE	EG	Me2CO	PC	NH3	FA	NMF	DMF	DMA	DEA	NMPy	MeCN	MeNO2	PhNO2	Py	1‐CNPy	DMSO	TMS	HMPT	1,1DClE	1,2DClE	GBL
H⁺				8.7	11.1	9	3		6.3		50	-97			-14.4			-25	44.8	95	33	-25		-19.4		-41.2
Li⁺	31.6068	-520.351	0.026524	3	10.3	11			3.3	10	23.8	-35	-10	-20	-22.4	-22		-35	28.5	48	38			-17.3	6				16.2
Na⁺	15.2411	-414.033	0.071424	7	14.9	17	19		1.3	10	14.6	-17	-8	-7	-10.6	-12.1	-2	-15	11.9	31.6	36	16	24	-12.7	-3	-17	29	25	8.9
K⁺	9.23598	-329.496	0.798563	8.4	16.4	17	20	39	1.6	4	5.3	-12	-4.3	-6	-9.1	-11.7	-10	-11	6.5	15.4	21	6	14	-12.2	-4	-16	30	26	4.1
Rb⁺	7.68299	-298.255	1.25008	9.6	16.6	19	23			4	-1	-13	-5	-8	-10.2	-8	-9	-8	5.4	11	19	13		-10.2	-9	-10	29	25	2.9
Cs⁺	6.08163	-259.696	2.55217	8.7	16.1	17	19			4	-7	-15	-6	-7	-11.9	-7	-11	-10	4.5	5.6	18	35		-12.9	-10	-7	28	24	1.2
Ag⁺	7.80981	-301.012	1.14368	8.5	4.5	1		50	1	9	18.8	-100	-15.4	-15	-17.2	-29	-29	-26	-24.1	21		-57		-32	-4	-44
Tl⁺	6.53986	-271.495	3.49759	4.1	7					3	11		-1	-10	-11.5	-13	-12	-15	8	16	15	-1		-21.9	-12	-26			2.3
NH₄⁺	9.59906	-336.127	1.35351	11.3	7	7	12					-28						-24			27
Me₄N⁺	5.40601	-240.728	7.94977	7	15.6	11	12			3	-11		-1.3		-5.3			-3	3.3	-4.6	4		-2	-2			18	16
Et₄N⁺	4.37777	-209.9	14.8045	1	3.5	5	7				-13		-7.1		-8				-7	-10.3	-5			-9			11	5
Pr₄N⁺	3.86235	-191.459	21.9777	-8.8	-2	-6	-7				-22				-17				-13	-20	-16
Bu₄N⁺	3.50692	-178.843	29.1444	-23.1	-12	-17	-12				-31		-23.9	-33	-29				-32		-31							-23
Ph₄P⁺	3.19827	-164.267	43.3749	-23.4
Ph₄As⁺	3.17871	-165.032	44.2162	-23.4	-22.4	-25	-20		-21.3	-32	-36				-39.1	-38.7	-38.7	-40	-34.2	-32.6	-36	-38	-39	-38.3	-36	-39	-27	-33
Mg²⁺	35.7928	-879.562	0.046085	2
Ca²⁺	20.9416	-701.887	0.478634	11.2
Sr²⁺	16.9855	-633.469	0.850279	7.1
Ba²⁺	11.6132	-553.45	1.5423	16.9								-66			-21.4				57.4					-26.6
Cu²⁺	22.4221	-725.2	0.397844	25.2	19.1	43			6.2	43.5	73	-181	-4	-4	-14.4	-27	-45		66.8	95		-50		-42.2	62	-52
Zn²⁺	22.7888	-730.723	0.312964	27.4	36					83	81	-149			-29.6	-7	-33	-8	28.3					-40.3	76	-86
Cd²⁺	17.3325	-637.282	0.661493	32.9	22					61	70	-152	-28	-32	-33.5	-22	-22	-22	42.2					-60.4	39	-36
Hg²⁺	15.1449	-591.642	1.00158	48	64					2	47	-228			-44				42	31		-79		-48
Pb²⁺	14.1497	-568.935	2.25981	10.3	21.8					78	47		-12		-34	-36	-34	-35	30					-65.7	29	-38
BPh₄⁻				-22.7	-21.3	-25	-20		-21.7	-32	-36		-23.9	-33	-38.5	-38.7		-40	-33.6	-32.6	-36	-38	-39	-37.1	-36	-39	-27	-33

## Sheet: Cation GFET2
Ion	DN	H⁺	Li⁺	Na⁺	K⁺	Rb⁺	Cs⁺	Ag⁺	Tl⁺	NH₄⁺	Me₄N⁺	Et₄N⁺	Pr₄N⁺	Bu₄N⁺	Ph₄P⁺	Ph₄As⁺	Mg²⁺	Ca²⁺	Sr²⁺	Ba²⁺	Cu²⁺	Zn²⁺	Cd²⁺	Hg²⁺	Pb²⁺	BPh₄⁻
MeOH	19	8.7	3	7	8.4	9.6	8.7	8.5	4.1	11.3	7	1	-8.8	-23.1	-23.4	-23.4	2	11.2	7.1	16.9	25.2	27.4	32.9	48	10.3	-22.7
EtOH	19.2	11.1	10.3	14.9	16.4	16.6	16.1	4.5	7	7	15.6	3.5	-2	-12		-22.4					19.1	36	22	64	21.8	-21.3
1‐PrOH	19.8	9	11	17	17	19	17	1		7	11	5	-6	-17		-25					43					-25
1‐BuOH		3		19	20	23	19			12	12	7	-7	-12		-20										-20
TFE					39			50
EG	20	6.3	3.3	1.3	1.6			1								-21.3					6.2					-21.7
Me2CO	17		10	10	4	4	4	9	3		3					-32					43.5	83	61	2	78	-32
PC	15.1	50	23.8	14.6	5.3	-1	-7	18.8	11		-11	-13	-22	-31		-36					73	81	70	47	47	-36
NH3	59	-97	-35	-17	-12	-13	-15	-100		-28										-66	-181	-149	-152	-228
FA	24		-10	-8	-4.3	-5	-6	-15.4	-1		-1.3	-7.1		-23.9							-4		-28		-12	-23.9
NMF	27		-20	-7	-6	-8	-7	-15	-10					-33							-4		-32			-33
DMF	26.6	-14.4	-22.4	-10.6	-9.1	-10.2	-11.9	-17.2	-11.5		-5.3	-8	-17	-29		-39.1				-21.4	-14.4	-29.6	-33.5	-44	-34	-38.5
DMA	27.8		-22	-12.1	-11.7	-8	-7	-29	-13							-38.7					-27	-7	-22		-36	-38.7
DEA	32.2			-2	-10	-9	-11	-29	-12							-38.7					-45	-33	-22		-34
NMPy	27.3	-25	-35	-15	-11	-8	-10	-26	-15	-24	-3					-40						-8	-22		-35	-40
MeCN	14.1	44.8	28.5	11.9	6.5	5.4	4.5	-24.1	8		3.3	-7	-13	-32		-34.2				57.4	66.8	28.3	42.2	42	30	-33.6
MeNO2	2.7	95	48	31.6	15.4	11	5.6	21	16		-4.6	-10.3	-20			-32.6					95			31		-32.6
PhNO2	8.1	33	38	36	21	19	18		15	27	4	-5	-16	-31		-36										-36
Py	33.1	-25		16	6	13	35	-57	-1							-38					-50			-79		-38
1‐CNPy				24	14						-2					-39										-39
DMSO	29.8	-19.4	-17.3	-12.7	-12.2	-10.2	-12.9	-32	-21.9		-2	-9				-38.3				-26.6	-42.2	-40.3	-60.4	-48	-65.7	-37.1
TMS	14.8		6	-3	-4	-9	-10	-4	-12							-36					62	76	39		29	-36
HMPT	38.8	-41.2		-17	-16	-10	-7	-44	-26							-39					-52	-86	-36		-38	-39
1,1DCE				29	30	29	28				18	11				-27										-27
1,2DCE	0			25	26	25	24				16	5		-23		-33										-33
GBL	18		16.2	8.9	4.1	2.9	1.2		2.3
water	18
Cation ϸ			31.6068	15.2411	9.23598	7.68299	6.08163	7.80981	6.53986	9.59906	5.40601	4.37777	3.86235	3.50692	3.19827	3.17871	35.7928	20.9416	16.9855	11.6132	22.4221	22.7888	17.3325	15.1449	14.1497		<---Sho values

## Sheet: Polymers
Ion	MetricSho	Sho polyatomicisty error		pNIPAM particles	Lysozyme c	FeOx-21 particles	pNIPAM c		Hemoglobin Ks (m-1)	PVCL - ILs	pNIPAM bmim+ IL - data thief (at 15mg/mL)	pNIPAM bmim+ IL - data thief (at 15mg/mL)	PVCL LCST	MWCNT.PVCL T_agg	PNASME Cloud Point at 500mM (°C)	PNASME Cloud Point (1M)	Air.pNIPAM.Aqueous	ELP V5-120	ELP V5A2G3-120	ELP V5-120 error	ELP V5A2G3-120 error	PSPE	PEOX-500K (slope,s (°C/M))	PEOX-500K (200mM CST (°C))
F⁻	-8.64148			-22.5			-9	-9							35.75	26	13	-26.3	-43	1.6	0.8		-55.5	48.5
Cl⁻	-6.25162			-12	10.3	4	-5.3	-5.3	0.28	26.504	-2.2	-25.5336	34	31	40.35	35	-8	-11.4	-18	0.4	0.5		-27.8	55.5
Br⁻	-5.63074			-7.3	-8.7		-3.7	-3.18919		65.7354	-1.8	-26.2257			43.4	40	-33	-7.3	-9.4	0.7	1.4		-8.3	59.5
I⁻	-4.90372			-1.6	-26.3		-1.5	-0.607547		106.447	-1.5	-26.5551	39	49	51.6	54	-60	-6.5	-7.4	0.7	2.2		-10.1	63.5
CH₃COO⁻	-7.11559			-14.9						33.2113	-2.9	-38.415					-69
NO₃⁻	-5.78339	-0.472313		-7.9	-0.9		-3.5	-3.05385							44.5	42	-22	-8.8	-14	1.2	0.5		-7.2	64
NCS⁻	-4.98168	-0.577777	-0.577777	-1	-31.4		-1.4	-0.101887							52.45	55		-6.6	-7	1	1.7
NCS⁻	-4.4039		-0.577777							118.379	-0.8	-10.4921	44	54									-3.5	68.5
ClO₄⁻	-6.1486	-0.615961					-6.4	-4.89508										-12.5	-20	0.8	2.2
ClO4(3O, 1whole)	-5.99461
ClO₄⁻	-5.53264		-0.615961		-17										49.5		-58						-7.6	64
H₂PO₄⁻	-8.70623		-0.935249			9	-11.5	-11.5	3.38						30			-33.7	-43	1.8	1		-77.2	43
H₂PO₄⁻	-5.3471	-0.935249
HCO₃⁻	-7.54615					7
HSO₄⁻	-7.46714	-0.0634619								31.5051	-3.3	-51.8579
BF₄⁻	-4.81975										-1.2	-18.0365
SO₄²⁻	-8.1873						-9.15	-9.15									4
SO₄²⁻	-9.21836	-0.0634619	-0.0634619
SO₄²⁻	-10.2494								4.97						17.5			-35.3	-39.5	2.4	2.1		-135.7	33
S₂O₃²⁻	-7.39385		-1.69804				-8.15	-8.15
S₂O₃²⁻	-8.24287	0.84902	0.84902
S₂O₃²⁻	-9.09189														26.75			-27.2	-26.5	1.6	0.8		-103.4	38.5
CO₃²⁻	-8.28197						-12.55	-12.55					31	26
CO₃²⁻	-9.62958	-1.34761	-1.34761
CO₃²⁻	-10.9772																	-38.5	-50	2.7	1.8		-169	27.2
Filler for python error
Filler for python error				https://www.sciencedirect.com/science/article/pii/S0021979718300675?casa_token=z3qUxrdu-64AAAAA:yazMo4Hmze9jLViteWHqLS8MCWZExt6II27UvPHNQGAljU3bGpsJ74wWgup6bItwjMVabqm6SRo - Bens paper	https://www.pnas.org/content/pnas/106/36/15249.full.pdf	https://www.mdpi.com/2073-4360/10/4/451	https://pubs.acs.org/doi/pdf/10.1021/ja0546424		https://www.sciencedirect.com/science/article/abs/pii/0003986177904349	https://pubs.acs.org/doi/pdf/10.1021/acssuschemeng.7b03790	https://pubs.rsc.org/en/content/articlepdf/2014/cp/c4cp00010b		https://link.springer.com/content/pdf/10.1007%2Fs00396-018-4424-6.pdf		https://pubs.rsc.org/en/Content/ArticleLanding/2017/PY/C7PY00274B#!divAbstract		https://pubs.acs.org/doi/10.1021/ja073869r	https://pubs.acs.org/doi/pdf/10.1021/jp8062977				https://pdf.sciencedirectassets.com/271607/1-s2.0-S0032386100X05459/1-s2.0-0032386186902697/main.pdf?x-amz-security-token=AgoJb3JpZ2luX2VjEGsaCXVzLWVhc3QtMSJHMEUCIQCeHHC0PUHLXaJNjDx7fpK31IYftAjOMM8a%2Bdz1QjM4owIgfZmkiYOg6HM%2FGJY%2BCoYmld9wtYSj4Chl7on4ldsZJnkq2gMIJBACGgwwNTkwMDM1NDY4NjUiDMLRMcjRjyTEvi6LMyq3AwLgc4syOGNRTo5vKI3tOBIT5tvCrA49gGmqSPtRjMQdT1dKSt5kJ3%2FWhDwNAE3y6jbjEy4TWU0iYz%2BAA9TBW%2…		https://pubs.acs.org/doi/pdf/10.1021/jp310648d
Anion	MetricSho	Sho polyatomicisty error(+)	Sho polyatomicisty error(-)	DLCST (1M)	c(oC/mol)	FeOx-21 - Na salts - PiPOx	c(oC/mol)	DLCST (1M) from Langmuir isotherm	K salts (small data set)	DLCST (oC/M)			PVCL LCST(0.1M)	MWCNT/PVCL LCST(0.1M) (Doesn't aggregate by 60 deg in absense of salt)	PNASME LCST (Data Thief)	~PNASME LCST (eyeballed)	D_surface potential (mV)	c	c			P(SPE) - difficult to extract the data		Cloud point (Na salts)

## Sheet: BIOL
MetricSho	POL	Ion	Myosin	Lactate D	Fumarase	Estradiol	T-BAEE	T-BAPNA	T-PNPA	C-PNPA	Acylase	Lipase	B-Amylase	B-Galactosidase	Estradiol-17B	Estradiol 3-sulphate	Estradiol 3-methyl-ether			Lysosyme1	Lysosyme2		Hemoglobin Ks (m-1)		ALKALINE PHOSPHATASE	ALKALINE PHOSPHATASEpH7.5					ALKALINE PHOSPHATASEpH10.3								HSV-1 protease	SQRT(activity)			Carbonic Anhydrase			FAD 50% inhibition conc	FAD relative inhibition	D-amino acid oxidase - all at different concs so won't bother	Inhibition of acetoacetic decarboxylase by monovalent anions (Conc for 50% inhib x10^-5M)
-7.88678		H2O																						H2O	#N/A	1.23			20.4	16.6	227			943	4.15				1	0
0		H
-8.64148		F⁻																																					6.15	2.47992									10000
-6.25162	4.22028	Cl⁻	14	65	40	27	62	11	170	178	70	108	59	20	39	75	33			3.54	0.33225		0.28	Cl	-1	0.62	0.65962	-0.0396197	59.8	96.5	288	287.598	0.402218	1050	3.65	3.29771	0.352287		0.96	0.979796	1.08	1.03923	0.61			8.5	1		5000
-5.63074	5.83534	Br⁻	8	27	60	10	56	5	135	100	40	83	40	19	24	32	20			2.59	-1.8642																		0.23	0.479583	0.07	0.264575	0.69			3	2.8		1000
-4.90372	8.87622	I⁻		3	3	8	50	5	90	92	39	80		16																									0.07	0.264575	0	0	0.172			2	4.2		100
-9.42391		OH⁻
-7.11559	6.42748	CH₃COO⁻	18		75	41	82	30					65	34	82	100	100			5.35	0.8741																		1.71	1.30767	7.03	2.65141				25	0.3
-5.78339	4.1939	NO₃⁻	10	32		15	55	9	120	89	45	100	40	17	25	32	19							NO3	-0.616421	0.59	0.441281	0.148719	56.9	96.4	374	375.243	-1.24325	1025	2.74	2.7426	-0.00259837									4.5	2		126
-6.2557	4.1939	NO₃⁻																																									0.182
-5.04616		NO₂⁻
-6.47513		NO₂⁻
-4.4039	7.59843	NCS⁻					35	2	84	15	10	46	2	12	18	10	21																																11
-4.98168	7.59843	NCS⁻		1	1	2			84	15	10	46	2							1.07	-12.868
-5.55946	7.59843	SCN⁻							84	15	10	46	2											NCS(N)	-0.624345	0.23	0.336862	-0.106862	8.52	37	418	417.159	0.841035	931	2.22	2.47712	-0.257119
-6.1486	5.07515	ClO₄⁻							90	10	33	67	11
-5.53264	5.07515	ClO₄⁻												11	18	10	18			2.38	-9.7539																		0.06	0.244949	0	0							73
-7.54615	4.30504	HCO₃⁻
-6.08372		ClO₃⁻																																															400
-6.61655		BrO₃⁻																																															7600
-6.58917		BrO₂⁻
-7.03053		IO₃⁻																																															10000
-8.18731		SO₄²⁻																		5	6.8883			SO4	-0.926617	1.56	1.56224	-0.00223727	13.5	8.65	345	-74.7305	419.731	949	5.5	5.59257	-0.0925692		4.7	2.16795	110	10.4881				12	0.7
-10.2494		SO₄²⁻																					4.97
-8.70623		H₂PO₄⁻																					3.38
-7.6		H₂PO₄⁻
-9.21099		HPO₄²⁻																																					5.68	2.38328	118	10.8628
-9.202		PO₄³⁻																																					5.68	2.38328	118	10.8628				15	0.6
-7.82075		citrate³⁻
-12.0402		citrate³⁻																																					11	2.3979	202	14.2127
#N/A		HSO₃⁻																																					7.72		164								7
-6.16182		CCl₃COO⁻																																							133								33000
-5.99579	16.2863	salicylate⁻																																					5.06
-6.87316		formate⁻																																					7.32		76.5
-7.26296		propanoate⁻																																					3.97
-7.2191		butanoate⁻
		isocitrate																																					7.72
		cis-aconitate																																					5.06
		HPO2O7																																					7.32
		succinate																																					3.97
		D-Glutamate																																					2.9
		L-Glutamate																																					2.45
6.08163		Cs
7.68299		Rb
9.23598		K																																									0.61
15.2411		Na																																									0.69
31.6068		Li
9.60147		NH4																																									0.7
5.40834		N(CH₃)₄
			https://pubs.acs.org/doi/pdf/10.1021/bi00869a036												1M					ΔF/(t·clysoz) (1/(h·μM))			https://www.sciencedirect.com/science/article/abs/pii/0003986177904349	https://pdf.sciencedirectassets.com/272805/1-s2.0-S0005274400X0112X/1-s2.0-0005274473901320/main.pdf?x-amz-security-token=AgoJb3JpZ2luX2VjEGkaCXVzLWVhc3QtMSJHMEUCIFhyuofM8MA%2BKgPGgdkRcNLRtPDlcwZgnq98Mg%2FPx8zIAiEA2vbZ3weRAK%2FJye7oBwCFCPUHNDY%2BcrV5St3IRO2fWMIq2gMIIhACGgwwNTkwMDM1NDY4NjUiDMmKbYvBihThKQjtICq3A0gNyuPUGRFJ%2BcXWLEuxOQWfrrBxZEaQNnMY7OaK3qajr83C8hdcEbCjZ1qVu%2FFKsvJi0OLBFkt8CT80bwD2h…															https://www.cambridge.org/core/services/aop-cambridge-core/content/view/C6069A82D21EFE393025971DA9DCC9DB/S0033583597003363a.pdf/hofmeister_series_salt_and_solvent_effects_on_interfacial_phenomena.pdf				https://www.ncbi.nlm.nih.gov/pmc/articles/PMC1258342/pdf/biochemj00958-0140.pdf		http://actachemscand.org/pdf/acta_vol_10_p0122-0133.pdf				https://pdf.sciencedirectassets.com/778417/1-s2.0-S0021925818X80156/1-s2.0-S0021925818813035/main.pdf?X-Amz-Security-Token=IQoJb3JpZ2luX2VjEP%2F%2F%2F%2F%2F%2F%2F%2F%2F%2F%2FwEaCXVzLWVhc3QtMSJHMEUCIQD2rUVbTBN7EoBgm9bj0g2MJCf5TEMRVQ16891syoJStAIgWqGC1hGcPXJh0lMe8JJHD2clCsBHjwUlpQkiER041fsqtAMINxADGgwwNTkwMDM1NDY4NjUiDO7YPm5lWB1GlmvG1CqRA%2FvA5tSnRS5OsAyinV8HTXaFys6G3P1bATIIzMz4OeVml3b8r4V1Ga24EAVq…
			Observed	Observed	Observed	Observed	Observed	Observed	Observed	Observed	Observed	Observed	Observed	Observed	Observed	Observed	Observed			0.5 M	Slope (lysosyme)		K salts (small data set)	Anion	DDEC6	Km(uM)	Predicted	Diff	V*(units/mg)	V/Km	Km(uM)	Predicted	Diff	V*(units/mg)	V/Km	Predicted	Diff		Relative activity (.2M)		Relative activity (.8M)		K+ salts		K_I (Na salts)	50% inhib conc (x10^-2)	Relative inhibition
https://reader.elsevier.com/reader/sd/pii/S0301462206001190?token=DDADF48CA1498368DF6494B65088FCDF217455142D06A83FBF402C91E9A57F9396AD78BB151A99C39C776103F2662D6C			bacteria growth (log C/Co)
	sho	threading time of polypseudorotaxane	S. aureus	P. aeruginosa
F	-8.64148	118
OH(TOT)	-7.40041	103
Cl	-6.25162	79	2.4	-0.5
Br	-5.63074	63	1.4	-1.9
H2PO4(TOT)	-5.3471	55
HCO3(TOT)	-6.09623	40
NO3	-5.78339	36	1.6	-1.4
I	-4.90372	35	-1	-3.8
NCS(avg)	-4.98168	30	-0.6	-3.8
IO3(TOT)	-4.89789	25
ClO4(TOT)	-5.53264
water(O)	-7.88677	97	-1	2.9
[truncated: 24 more columns]

## Sheet: SN2
Ion	AN	Cl - SN2	SCN - SN2	Br - SN2	Solvent Sho+	Cl - CN		I - CN
MeOH	41.5	-5.5	-3.3	-4.1	7.34799	4.9298	36.2241	3.7169
Water	54.8	-5.45	-3.5	-4.4	8.37915	6.7522	56.5777	No peaks det
FA	39.8	-4.3	-2.8	-3.4	7.15249	5.7108	40.8464	No peaks det
DMF	16	0.4	-1.1	0.1			0
DMA	13.6	0.9	-0.8		2.91168	9.0384	26.3169	No peaks det
MeCN	18.9	-0.9	-1.9		2.97806	7.5591	22.5115	10.7532
ACE	12.5	0.7	-0.8	1	2.80548	7.768	21.793	No peaks det
SLOPE:		-0.168757	-0.0669487	-0.13581
y-int:		2.7303	-0.143487	2.31088
sho:		-6.25162	-4.4039	-5.63074
https://pubs.acs.org/doi/pdf/10.1021/cr60257a001?casa_token=7g_0LXt7hnsAAAAA:aVVg413NcGNYRInDWKHPdnSBPLtfvKKwwmmicHZUb0i4L_TDfFlWaZXIQpD8mDFQzPBaFTcXEk-7lWhebw

## Sheet: Inert
MP2/aug-cc-pVQZ(-PP/X2C)	Charge	Electrostatic Potential Energy Kr	MetricSho	1/sho	Ion	Inert Gas Partial Charge (DDEC6) - He	Inert Gas Partial Charge (DDEC6) - Ne	Inert Gas Partial Charge (DDEC6) - Ar	Inert Gas Partial Charge (DDEC6) - Kr	Inert Gas Partial Charge (DDEC6) - Xe	Inert Gas Partial Charge (DDEC6) - Rn	basis set for Kr	Inert Gas Induced dipole moment magnitude	Inert Gas Induced dipole moment magnitude - He	Inert Gas Induced dipole moment magnitude - Ne	Inert Gas Induced dipole moment magnitude - Ar	Inert Gas Induced dipole moment magnitude - Kr	Inert Gas Induced dipole moment magnitude - Xe	Inert Gas Induced dipole moment magnitude - Rn		Interatomic distance	Interatomic distance - He	Interatomic distance - Ne	Interatomic distance - Ar	Interatomic distance - Kr	Interatomic distance - Xe	Interatomic distance - Rn	MP2/aug-cc-pVQZ(-PP/X2C)													placeholder to scroll for figures
	3	-1612.32	168.605	0.00593101	B³⁺							aug-cc-pVQZ	B³⁺								B³⁺
	3	-1352.2	61.4387	0.0162764	Al³⁺	0.068277	0.103607	0.363277	0.532405	0.794443	0.911624	aug-cc-pVQZ	Al³⁺	0.271322	0.454655	1.13888	1.35694	1.56068	1.65808		Al³⁺	1.669	1.832	2.1277	2.2775	2.4886	2.5862
	3	-1169.5	38.0296	0.0262953	Ga³⁺	0.115794	0.168139	0.517135	0.714202	1.04801	1.16619	aug-cc-pVQZ	Ga³⁺	0.231128	0.379685	0.969659	1.15496	1.28333	1.35082		Ga³⁺	1.6709	1.8787	2.1508	2.308	2.545	2.6499
	3	-1037.93	28.0156	0.0356944	In³⁺	0.084083	0.122361	0.429128	0.585266	0.877689	0.994686	aug-cc-pVQZ-PP	In³⁺	0.192014	0.324507	0.886818	1.09588	1.27797	1.37217		In³⁺	1.9129	2.1167	2.3537	2.4858	2.7089	2.8031
	3	-971.09	24.1286	0.0414446	Tl³⁺	0.115709	0.168157	0.608386	0.798845	1.13563	1.25335	aug-cc-pVQZ-PP	Tl³⁺	0.176993	0.296129	0.769569	0.933754	1.04088	1.10259		Tl³⁺	1.9077	2.1394	2.3691	2.5152	2.8074	2.9161
	2	-1042.7	87.8253	0.0113862	Be²⁺	0.056481	0.084627	0.250665	0.346944	0.497044	0.570163	aug-cc-pVQZ	Be²⁺	0.229705	0.370167	0.917561	1.10277	1.30332	1.40474		Be²⁺	1.4355	1.5896	1.8802	2.0141	2.1937	2.2693
	2	-869.616	35.7918	0.0279394	Mg²⁺	0.021177	0.031077	0.101442	0.150694	0.238366	0.290489	aug-cc-pVQZ	Mg²⁺	0.153904	0.264952	0.773556	0.995553	1.281	1.42008		Mg²⁺	1.9173	2.0731	2.3544	2.4809	2.6501	2.7185
	2	-725.468	20.9605	0.0477089	Ca²⁺	0.145971	0.017596	0.05968	0.082563			aug-cc-pVQZ-X2C	Ca²⁺	0.306024	0.187811	0.594362	0.803572				Ca²⁺	1.9356	2.5471	2.8072	2.9121
	2	-666.407	17.1393	0.0583454	Sr²⁺	0.1445	-0.030125	0.025334				aug-cc-pVQZ-X2C	Sr²⁺	0.32992	0.171875	0.545693					Sr²⁺	2.0587	2.5669	2.8651
	2	-594.606	13.5029	0.0740582	Ba²⁺		0.406313	0.51846				aug-cc-pVQZ-X2C	Ba²⁺		0.042495	0.223109					Ba²⁺		2.5253	3.2901
	1				H⁺	0.267842	0.279339	0.517839	0.602813	0.712259	0.751969	aug-cc-pVQZ	H⁺	0.145177	0.177395	0.341639	0.365165	0.367316	0.415713		H⁺	0.7726	0.9932	1.2809	1.4126	1.5843	1.6573
	1	-494.965	31.6074	0.0316382	Li⁺	0.007049	0.010309	0.026749	0.03723	0.054537	0.065767	aug-cc-pVQZ	Li⁺	0.081898	0.141452	0.422183	0.557348	0.752302	0.859082		Li⁺	1.9244	2.067	2.3924	2.5211	2.6944	2.7473
	1	-414.572	15.2427	0.0656052	Na⁺	0.003205	0.004424	0.013921	0.020295	0.030489	0.038177	aug-cc-pVQZ	Na⁺	0.056609	0.10018	0.32008	0.436104	0.610994	0.709417		Na⁺	2.4046	2.5631	2.8536	2.9648	3.1311	3.1733
	1	-344.342	9.2468	0.108146	K⁺	0.101015	0.003175	0.007421	0.009976			aug-cc-pVQZ-X2C	K⁺	0.055108	0.064066	0.230829	0.320686				K⁺	2.3353	3.2998	3.449	3.5669
	1	-316.809	7.68744	0.130082	Rb⁺	0.078972		0.008992	0.011077			aug-cc-pVQZ-X2C	Rb⁺	0.102597	0.09093	0.210038	0.292639				Rb⁺	2.4692	2.989	3.5664	3.6973
	1	-281.555	6.21975	0.160778	Cs⁺		-0.017745		0.001458			aug-cc-pVQZ-X2C	Cs⁺		0.046064		0.247415				Cs⁺		3.635		4.1104
	1	-350.072	9.60147	0.104151	NH₄⁺	0.002777	0.005642	0.01526	0.021772			aug-cc-pVQZ	NH₄⁺	0.032549	0.059751	0.212043	0.298867				NH₄⁺	3.3581	3.3724	3.3581	3.0801
	1	-283.412	6.15718	0.162412	guan⁺	0.009112	0.016112	0.038867	0.05326			aug-cc-pVQZ	guan⁺	0.018867	0.037674	0.144351	0.203726				guan⁺	2.4482	2.433	2.6292	2.6769
	1	-263.673	5.40834	0.184899	N(CH₃)₄⁺	0.003633		0.02133				aug-cc-pVQZ	N(CH₃)₄⁺	0.014835		0.113143					N(CH₃)₄⁺	2.9213		2.9573
	-1				H-	-0.005841	-0.009902	-0.021172	-0.030857	-0.04892	-0.081397	aug-cc-pVQZ	H-	0.004452	0.02957	0.170526	0.26272	0.416577	0.52541		H-	5.8874	4.4617	3.7146	3.5895	3.5101	3.3304
	-1		-8.64148	-0.115721	F⁻	-0.000789	-0.001838	-0.015501	-0.02966	-0.061963	-0.087923	aug-cc-pVQZ	F⁻	0.028964	0.061854	0.259301	0.381255	0.580657	0.704511		F⁻	3.4166	3.2427	3.0585	3.0091	2.958	2.9006
	-1	-334.45	-7.11559	-0.140537	CH₃COO⁻	-0.003777		-0.005022	-0.01113	-0.030558	-0.063734	aug-cc-pVQZ	CH₃COO⁻	0.016803		0.184074	0.264554	0.40293	0.520044		CH₃COO⁻	3.6039		3.4365	3.431	3.4424	3.3339
	-1	-264.506	-6.25162	-0.159959	Cl⁻	-0.000531	-0.001291	-0.008251	-0.015263	-0.02977	-0.043438	aug-cc-pVQZ	Cl⁻	0.021036	0.046045	0.191935	0.283019	0.431212	0.526447		Cl⁻	4.079	3.8165	3.6656	3.639	3.649	3.5997
	-1	-285.703	-5.63074	-0.177597	Br⁻	-0.000557	-0.001455	-0.007627	-0.013794	-0.026928	-0.040411	aug-cc-pVQZ	Br⁻	0.019669	0.042593	0.177649	0.262031	0.399575	0.492062		Br⁻	4.212	3.9634	3.8157	3.7953	3.8052	3.7382
	-1	-270.012	-5.78339	-0.172909	NO₃⁻	-0.001155	0.005732	0.000151	-0.006714	-0.020419	-0.031059	aug-cc-pVQZ	NO₃⁻	0.021337	0.052923	0.17583	0.248855	0.366738	0.43924		NO₃⁻	3.4129	3.308	3.4152	3.2144	3.2959	3.2852
	-1	-252	-4.99829	-0.200068	I⁻	-0.000705	-0.001684	-0.006533	-0.01994	-0.022062	-0.033094	aug-cc-pVQZ-PP	I⁻	0.01767	0.038423	0.157361	0.23607	0.355917	0.43698		I⁻	4.4016	4.1556	4.069	4.0052	4.0766	4.0198
	-1	-249.552	-5.53264	-0.180746	ClO₄⁻	-9.6e-05	-0.000359	-0.006229	-0.012271	-0.023432	-0.034157	aug-cc-pVQZ	ClO₄⁻	0.021308	0.041435	0.157945	0.230847	0.347517	0.422678		ClO₄⁻	3.3446	3.3988	3.495	3.5106	3.5933	3.5642
	-1	-247.588	-5.55945	-0.179874	SCN⁻	-0.002037	-0.004036	-0.01206	-0.018523	-0.029744	-0.041257	aug-cc-pVQZ	SCN⁻	0.016206	0.034068	0.143211	0.214587	0.330381	0.41178		SCN⁻	3.4886	3.35	3.3755	3.3638	3.4043	3.3397
	-1	-199.041	-4.4039	-0.227071	NCS⁻		-0.002243	0.002966	0.000982		-0.014809	aug-cc-pVQZ	NCS⁻		0.029499	0.144271	0.208313		0.36586		NCS⁻		3.8515	3.5735	3.5523		3.5663
	-1	-210.298	-5.26325	-0.189997	PF₆⁻	0.000754	0.000437	-0.004034	-0.008857	-0.017509	-0.026551	aug-cc-pVQZ	PF₆⁻	0.023301	0.043373	0.159646	0.231306	0.344388	0.418001		PF₆⁻	3.1671	3.187	3.3472	3.3833	3.4825	3.457
	-2	-228.904	-10.2494	-0.0975665	SO₄²⁻		-0.005492	-0.02647	-0.045466	-0.082609	-0.116024	aug-cc-pVQZ	SO₄²⁻		0.076087	0.305245	0.452499	0.701788	0.872842		SO₄²⁻		3.2711	3.2084	3.1851	3.1898	3.1306
	-3	-425.728	-13.6305	-0.0733649	PO₄³⁻	-0.021704	-0.033358	-0.083475	-0.13058	-0.249252	-0.370348	aug-cc-pVQZ	PO₄³⁻	0.029152	0.072624	0.401043	0.655337	1.19996	1.75867		PO₄³⁻	3.6869	3.3645	3.1312	3.0533	2.9501	2.835
	-2	-570.892	-10.1984	-0.0980545	O²⁻	-0.033706	-0.038894					aug-cc-pVQZ	O²⁻	0.126304	0.026738						O²⁻		4.371	5.3302
	-2	-510.591	-8.46122	-0.118186	S²⁻	-0.037743	-0.03075	-0.119228	-0.229152	-0.383863	-0.568339	aug-cc-pVQZ	S²⁻	0.050392	0.027279	0.427368	0.853484	1.51028	2.10603		S²⁻	6.8122	5.1799	3.7283	3.5479	3.3975	3.2699
	-2	-456.48	-8.02017	-0.124686	Se²⁻	-0.033652	-0.044928	-0.10954	-0.186422	-0.400144	-0.652998	aug-cc-pVQZ	Se²⁻	0.068084	0.022611	0.344009	0.655342	0.856918	1.51368		Se²⁻	7.3049	5.0508	3.9164	3.748	3.7168	3.4041
	-2	-441.379	-7.5306	-0.132791	Te²⁻	-0.030318	-0.051591	-0.093326	-0.257018	-0.239537	-0.366874	aug-cc-pVQZ-PP	Te²⁻	0.087592	0.005793	0.26583	0.787346	0.871276	1.28988		Te²⁻	7.7621	5.1726	4.2267	3.9152	3.9399	3.7622
	-2	-423.89	-7.29176	-0.137141	Po²⁻	-0.034349	-0.066016	-0.104861	-0.271914	-0.255448	-0.390981	aug-cc-pVQZ-PP	Po²⁻	0.115777	0.004763	0.241228	0.783616	0.854385	1.30477		Po²⁻	8.1445	5.1125	4.2985	3.889	3.9759	3.7799
	-3	-622.597			N³⁻	-0.757856	-0.314644	-1.19805	-1.12149	-1.31247	-1.44267	aug-cc-pVQZ	N³⁻	2.3765	0.393414	4.6328	4.95393	3.54311	3.92752		N³⁻	1.5303	4.9316	2.4017	2.3361	2.0737	2.1347
	-3		-9.64148	-0.103719	P³⁻	-0.068251	-0.155408			-1.18764	-1.14393	aug-cc-pVQZ	P³⁻	0.004666	0.103286			4.14327	4.13062		P³⁻	5.3029	4.3712			2.8481	2.9151
	-3		-9.44263	-0.105903	As³⁻	-0.089903	-0.300908					aug-cc-pVQZ	As³⁻	0.07485	0.049973						As³⁻	5.8868	4.9779
	-3		-9.36644	-0.106764	Sb³⁻	-0.115821	-0.251372				-1.11754	aug-cc-pVQZ-PP	Sb³⁻	0.213525	0.359229				3.21062		Sb³⁻	6.8523	7.5657				3.2475
	-3		-9.2608	-0.107982	Bi³⁻	-0.106817	-0.236597			-0.930576	-1.07187	aug-cc-pVQZ-PP	Bi³⁻	0.2117	0.389439			2.64547	3.23542		Bi³⁻	7.0001	7.765			3.9939	3.3079

[truncated: 2 more sheets: SAPT data, cation vs anion charge states]
